# Supplementary material for: Kalanchoe sp. Extracts—Phytochemistry, Cytotoxic, and Antimicrobial Activities
Source: MDPI journal article supplement (doi:10.3390/plants12122268), 2023-06-10
Supplement: s1 [file s1]

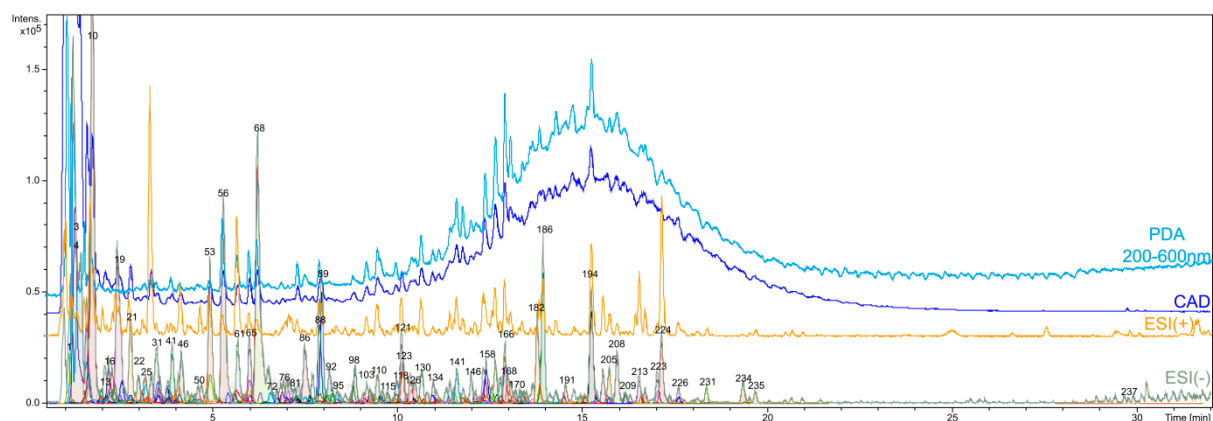

**Figure S1.** Phytochemical profiles of the water fraction of *Kalanchoe blossfeldiana* obtained by LC-QTOF-MS.

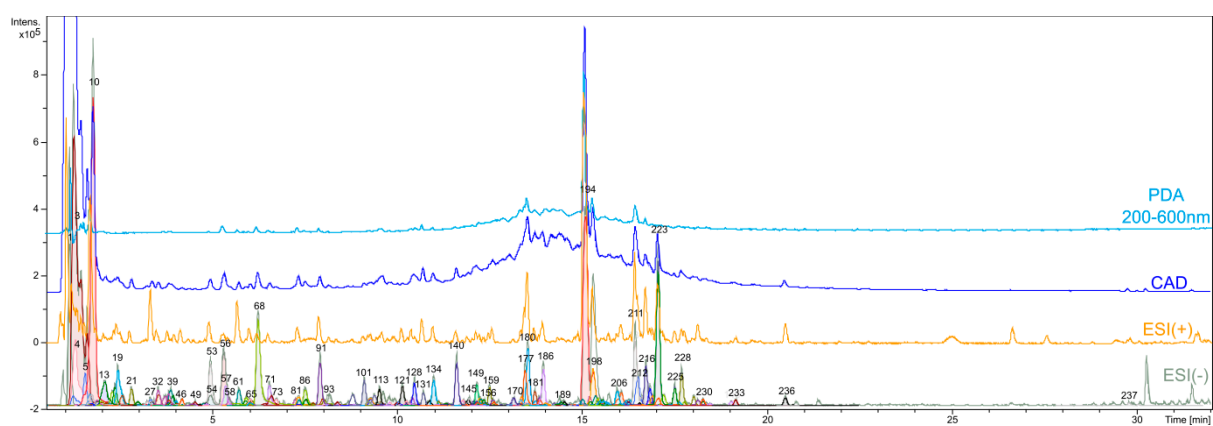

**Figure S2.** Phytochemical profiles of the water fraction of *Kalanchoe pinnata* obtained by LC-QTOF-MS.
