# Supplementary material for: Kalanchoe sp. Extracts—Phytochemistry, Cytotoxic, and Antimicrobial Activities
Source: Plants (Basel). 2023 Jun 10;12(12):2268. doi: 10.3390/plants12122268 (PMC10305294; doi:10.3390/plants12122268)
Supplement: Supplementary file 1 [file plants-12-02268-s001.zip › Table S1.xlsx]

## Sheet: Kalanchoe-cmpds
No	Name	RT [min]	ESI(-) Meas. m/z	ESI(-) adduct	ESI(+) Meas m/z	ESI(+) adduct	Formula	err [ppm]	mσ	rdb	FW-K.blos µg/mg	FW-K.pinn µg/mg	ID CL	Compound type	Most prominent ESI(-) MS2 ions	Most prominent ESI(+) MS2 ions
1	heptose/sedoheptulose?	1.13	245.043	M+Cl	233.063	M+Na	C7H14O7	0.1	8.7	0	+	+	3	Carbohydrate	119.0329 (31.2%, -126.01); 171.0051 (5.0%, -74.04); 179.0562 (5.3%, -65.99); 191.0573 (13.4%, -53.99); 209.0670 (100.0%, -35.98)	130.0505 (1.6%,-103.01); 134.0811 (0.8%,-98.98); 147.0764 (1.0%,-85.99); 157.0496 (2.8%,-76.01); 175.0601 (4.1%,-58.00); 193.0707 (3.6%,-39.99); 203.0528 (7.3%,-30.01); 215.0506 (1.2%,-18.01); 219.0267 (9.7%,-14.04)
2	malate	1.25	133.012	M-H	157.013	M+Na	C4H6O5	17.2	0.7	2	+	+	3	Organic acid	115.0018 (100.0%, -18.01)	118.0860 (35.5%,-38.93); 127.0164 (12.6%,-30.00); 130.0225 (5.7%,-26.99); 135.0287 (18.5%,-21.98); 141.0181 (84.6%,-15.99)
3	citrate-1	1.25	191.019	M-H	193.034	M+H	C6H8O7	1	3.8	3	207.6 ± 12.5	260.6 ± 9.0	3	Organic acid	111.0065 (33.2%, -80.01); 117.0175 (18.0%, -74.00); 129.0178 (19.2%, -62.00); 154.9970 (33.3%, -36.02); 173.0086 (100.0%, -18.01)	129.0190 (10.1%,-64.02); 135.0287 (2.6%,-58.01); 147.0287 (7.9%,-46.01); 157.0131 (53.8%,-36.02); 163.0604 (3.0%,-29.97); 174.0761 (2.9%,-18.96)
4	aconitate-1	1.29	173.008	M-H	175.024	M+H	C6H6O6	4.3	7.5	4	251.9 ± 14.9	220.4 ± 6.3	3	Organic acid	111.0066 (100.0%, -62.00); 129.0170 (59.0%, -43.99); 154.9968 (96.7%, -18.01)	118.0861 (5.6%,-56.94); 127.0164 (1.2%,-48.01); 130.0225 (1.0%,-45.00); 135.0287 (3.1%,-39.99); 139.0025 (0.9%,-36.02); 142.0215 (0.9%,-33.00); 147.0287 (7.8%,-27.99); 157.0131 (46.6%,-18.01)
5	ascorbate	1.53	175.024	M-H	177.039	M+H	C6H8O6	2.8	10.2	3	+	+	3	Organic acid	115.0018 (100.0%, -60.02)	130.0508 (11.0%,-46.99); 141.0180 (100.0%,-36.02)
6	aconitate-2	1.6	173.008	M-H	175.024	M+H	C6H6O6	4.2	8.6	4	40.5 ± 3.8	+	3	Organic acid	111.0070 (80.5%, -62.00); 129.0179 (53.9%, -43.99); 154.9972 (100.0%, -18.01)	117.0544 (1.7%,-57.97); 127.0394 (4.3%,-47.98); 130.0505 (4.5%,-44.97); 136.0615 (3.6%,-38.96); 145.0493 (17.5%,-29.97); 148.0968 (6.0%,-26.93); 157.0132 (26.1%,-18.01)
7	citrate-2/iso-citrate?	1.6	191.02	M-H			C6H8O7	0.1	2.4	3	19.1 ± 2.7	73.0 ± 13.9	3	Organic acid	111.0068 (38.2%, -80.01); 117.0179 (20.8%, -74.00); 129.0178 (20.0%, -62.00); 154.9973 (33.5%, -36.02); 173.0088 (100.0%, -18.01)
8	ethyl-Hex?	1.73	253.093	M+CH2O2-H	226.128	M+NH4	C8H16O6	-0.6	27.4	1	+	+	3	Acyclic alcohol glycoside	109.0651 (13.3%, -144.03); 139.0398 (32.5%, -114.05); 149.0406 (21.7%, -104.05); 207.0883 (100.0%, -46.00)	127.0401 (8.2%,-99.09); 130.0505 (9.0%,-96.08); 145.0495 (31.9%,-81.08); 163.0602 (38.7%,-63.07); 175.0604 (5.8%,-51.07); 180.0868 (30.8%,-46.04); 193.0707 (6.2%,-33.06); 204.0866 (5.7%,-22.04); 209.1020 (100.0%,-17.03)
9	Unidentified-01	1.73	287.041	M-H	289.055	M+H	C11H12O9	-0.4	4.8	6		+	4	Unidentified	115.0004 (10.5%, -172.04); 151.0025 (6.8%, -136.04); 174.9996 (6.7%, -112.04); 200.0593 (10.1%, -86.98); 227.0187 (7.8%, -60.02); 243.0615 (42.3%, -43.98)	114.0546 (3.0%,-175.00); 165.0549 (0.4%,-124.00); 182.0813 (3.2%,-106.97); 190.0711 (0.7%,-98.98); 202.0709 (4.3%,-86.98); 209.1019 (1.0%,-79.95); 219.1340 (0.9%,-69.92); 227.0660 (0.4%,-61.99); 241.1547 (0.7%,-47.90); 253.1283 (1.1%,-35.93)
10	sarmentosin?	1.75	320.098	M+CH2O2-H	276.108	M+H	C11H17NO7	0.9	0.8	4	79.5 ± 10.1	121.2 ± 7.1	3	Acyclic nitrile glycoside	113.0232 (11.5%, -207.08); 159.0285 (15.2%, -161.07); 162.0444 (5.9%, -158.05); 175.0245 (5.9%, -145.07); 244.0809 (15.5%, -76.02); 256.0826 (65.5%, -64.02)	114.0547 (2.8%,-162.05); 129.1395 (0.6%,-146.97); 146.1652 (6.6%,-129.94); 176.0561 (0.3%,-100.05); 182.0812 (1.7%,-94.03); 228.2070 (9.6%,-47.90); 231.2257 (2.2%,-44.88); 252.1579 (1.5%,-23.95); 258.0974 (0.3%,-18.01)
11	hydroxymethyl-acetamidomethylene-succinate?	1.9	216.051	M-H	218.066	M+H	C8H11NO6	0.5	9.7	4		+	3	Organic acid	128.0724 (18.8%, -87.98); 154.0497 (10.2%, -62.00); 172.0605 (100.0%, -43.99)	130.0869 (1.3%,-87.98); 133.1051 (1.6%,-84.96); 162.1129 (1.2%,-55.95); 172.0604 (3.7%,-46.01); 176.0919 (9.3%,-41.97); 181.0496 (3.4%,-37.02); 188.1021 (1.3%,-29.96); 200.0555 (95.7%,-18.01)
12	Unidentified-02	1.9	387.093	M-H			C16H20O11	0.5	24.6	7		+	4	Unidentified	123.0077 (17.0%, -264.09); 138.0299 (45.3%, -249.06); 153.0301 (6.2%, -234.06); 179.0563 (5.6%, -208.04); 197.0455 (40.0%, -190.05); 225.9797 (5.5%, -161.11); 341.1083 (13.0%, -45.98)
13	beta-glucogallin*	1.99	331.067	M-H	333.082	M+H	C13H16O10	-0.4	21.5	6	+	+	1	Gallic acid derivative	123.0087 (8.6%, -208.06); 151.0027 (14.5%, -180.06); 168.0088 (7.3%, -163.06); 211.0255 (46.4%, -120.04); 223.0259 (7.4%, -108.04); 241.0353 (54.9%, -90.03); 271.0464 (100.0%, -60.02); 313.0535 (5.1%, -18.01)	171.0293 (58.6%,-162.05); 186.9565 (31.7%,-146.13); 284.0995 (100.0%,-48.98)
14	acetyl-S-carboxyethylcysteine?	2.1	234.044	M-H	236.059	M+H	C8H13NO5S	0.3	5.9	3	17.4 ± 0.6	+	3	Aminoacid	120.9950 (100.0%, -113.05); 146.0281 (20.4%, -88.02)	132.1020 (100.0%,-103.96); 145.0493 (1.2%,-91.01); 161.0441 (1.8%,-75.01); 172.0425 (2.2%,-64.02); 189.0392 (6.4%,-47.02); 204.0864 (1.5%,-31.97); 218.0483 (2.8%,-18.01)
16	Unidentified-04	2.19	200.056	M-H	202.071	M+H	C8H11NO5	-0.1	4.3	4	+	+	4	Unidentified	113.3227 (13.7%, -86.73); 124.9371 (29.8%, -75.12); 154.0490 (74.2%, -46.01); 173.0634 (14.5%, -26.99); 180.0286 (19.4%, -20.03); 182.0523 (33.1%, -18.00)	131.0343 (6.9%,-71.04); 149.0445 (22.0%,-53.03); 156.0658 (31.6%,-46.01); 166.0714 (11.8%,-36.00); 170.0814 (15.1%,-31.99); 176.1274 (4.9%,-25.94); 188.0920 (45.3%,-13.98)
17	Unidentified-05	2.28	396.097	M-H	415.138	M+NH4	C14H23NO10S	-0.4	10.8	4	4.6 ± 0.9	6.5 ± 0.5	4	Unidentified	120.9774 (5.2%, -275.12); 128.0158 (11.9%, -268.08); 179.0568 (10.9%, -217.04); 198.0235 (5.3%, -198.07); 241.0030 (5.1%, -155.09); 271.0463 (7.1%, -125.05); 290.0718 (8.9%, -106.03); 361.0762 (8.2%, -35.02)	221.0922 (13.9%,-194.05); 226.1286 (15.7%,-189.01); 236.0586 (49.0%,-179.08); 251.1124 (18.7%,-164.03); 267.1013 (10.5%,-148.04); 284.1343 (8.3%,-131.00); 295.1024 (10.1%,-120.04); 358.1710 (16.3%,-56.97); 398.1117 (54.0%,-17.03)
18	ethyl-Hex-Pent?/gaultherioside?	2.36	385.135	M+CH2O2-H	358.171	M+NH4	C13H24O10	-0.4	3.8	2	+	+	3	Acyclic alcohol glycoside	207.0873 (47.4%, -178.05); 339.1300 (100.0%, -46.01)	151.0965 (3.4%,-207.07); 175.0867 (7.6%,-183.08); 203.0814 (34.8%,-155.09); 221.0919 (100.0%,-137.08); 259.0808 (4.6%,-99.09); 267.1058 (3.5%,-91.06); 284.1338 (4.8%,-74.04); 295.1026 (18.2%,-63.07); 341.1438 (3.9%,-17.03)
19	pentanone-Hex?	2.45	309.119	M+CH2O2-H	282.154	M+NH4	C11H20O7	0.1	1.1	2	0.8 ± 0.3	4.8 ± 0.1	3	Acyclic alcohol glycoside	113.0197 (15.9%, -196.10); 128.0230 (8.4%, -181.10); 135.0122 (8.2%, -174.11); 147.0652 (11.8%, -162.05); 159.0297 (23.1%, -150.09); 179.0543 (27.1%, -130.06); 263.1152 (100.0%, -46.00)	127.0398 (1.6%,-155.11); 145.0493 (3.3%,-137.11); 163.0600 (2.7%,-119.09); 189.1234 (1.7%,-93.03); 208.0635 (1.7%,-74.09); 211.0963 (2.3%,-71.06); 229.1066 (31.0%,-53.05); 247.1173 (15.5%,-35.04); 253.1277 (2.4%,-29.03); 265.1278 (3.1%,-17.03)
20	homocitrate?	2.56	205.035	M-H	207.05	M+H	C7H10O7	-0.2	10.8	3	5.6 ± 1.3	3.8 ± 0.1	3	Organic acid	111.0068 (52.1%, -94.03); 129.0173 (17.9%, -76.02); 143.0326 (29.6%, -62.00); 154.9970 (46.9%, -50.04); 173.0090 (100.0%, -32.03); 187.0254 (6.7%, -18.01)	143.0338 (7.5%,-64.02); 151.0967 (8.0%,-55.95); 157.0133 (9.8%,-50.04); 161.0447 (15.8%,-46.01); 175.0240 (29.9%,-32.03); 189.0398 (22.8%,-18.01)
21	propyl-Hex?	2.79	267.109	M+CH2O2-H	223.118	M+H	C9H18O6	-0.1	0.8	1	10.8 ± 0.3	3.7 ± 0.1	3	Acyclic alcohol glycoside	161.0431 (5.2%, -106.07); 221.1037 (100.0%, -46.00)	127.0398 (4.0%,-96.08); 141.0545 (0.2%,-82.06); 145.0496 (20.8%,-78.07); 163.0603 (28.7%,-60.06); 171.0291 (0.2%,-52.09); 180.0867 (3.2%,-43.03); 187.0960 (0.3%,-36.02); 194.0664 (0.3%,-29.05); 205.1075 (0.5%,-18.01); 209.0807 (0.3%,-14.04)
22	hydroxymethylbutanoate-Hex-1?	3	279.109	M-H	298.15	M+NH4	C11H20O8	-0.4	13.6	2	1.7 ± 0.1		3	Acyclic acid glycoside	85.8052 (8.4%, -193.30); 113.0221 (38.1%, -166.09); 119.0355 (27.1%, -160.07); 144.0087 (8.6%, -135.10); 149.0463 (15.6%, -130.06); 161.0345 (8.6%, -118.07); 179.0502 (16.5%, -100.06); 182.7914 (9.6%, -96.32); 235.1564 (10.6%, -43.95)	217.1545 (2.9%,-81.00); 227.0918 (3.1%,-71.06); 251.1943 (7.3%,-46.96); 259.1287 (5.4%,-39.02); 281.1233 (16.7%,-17.03)
23	Unidentified-06	3.08	421.135	M-H			C17H26O12	0.6	21.3	5	+		4	Unidentified	165.0547 (100.0%, -256.08); 177.0575 (5.8%, -244.08); 195.0661 (38.0%, -226.07); 327.1083 (46.4%, -94.03)
24	theogallin-1?	3.18	343.067	M-H	345.082	M+H	C14H16O10	0.3	5.2	7	+		3	Gallic acid derivative	123.0069 (19.0%, -220.06); 137.0217 (12.0%, -206.05); 151.0023 (33.4%, -192.06); 168.0059 (19.0%, -175.06); 181.0500 (13.1%, -162.02); 191.0547 (14.4%, -152.01); 223.0236 (23.4%, -120.04); 241.0368 (17.7%, -102.03); 253.0363 (94.0%, -90.03); 325.0541 (14.4%, -18.01)	175.0603 (6.9%,-170.02); 203.0549 (20.6%,-142.03); 221.0654 (34.4%,-124.02); 238.0919 (10.3%,-106.99); 253.1279 (12.1%,-91.95); 267.1432 (7.1%,-77.94); 270.1547 (11.5%,-74.93); 298.1500 (6.7%,-46.93); 314.1810 (7.6%,-30.90); 322.1136 (9.9%,-22.97)
25	sulfoglucosyl-gallate-1?	3.18	411.024	M-H			C13H16O13S	0.1	12.4	6	2.1 ± 0.2		3	Gallic acid derivative	169.0133 (8.1%, -242.01); 241.0023 (100.0%, -170.02); 331.0675 (7.8%, -79.96)
26	theogallin-2?	3.22	343.067	M-H			C14H16O10	-0.3	18.5	7	1.3 ± 0.0		3	Gallic acid derivative	123.0069 (19.0%, -220.06); 137.0217 (12.0%, -206.05); 151.0023 (33.4%, -192.06); 168.0059 (19.0%, -175.06); 181.0500 (13.1%, -162.02); 191.0547 (14.4%, -152.01); 223.0236 (23.4%, -120.04); 241.0368 (17.7%, -102.03); 253.0363 (94.0%, -90.03); 325.0541 (14.4%, -18.01)
27	shikimate?	3.24	219.051	M+CH2O2-H			C7H10O5	-0.3	10.8	3		+	3	Benzoic acid derivative	110.9793 (7.1%, -108.07); 129.0170 (26.8%, -90.03); 133.0491 (10.8%, -86.00); 144.4990 (8.2%, -74.55); 154.9724 (7.1%, -64.08); 159.6129 (6.3%, -59.44); 173.0084 (89.6%, -46.04)
28	sachaloside-V?	3.32	322.114	M+CH2O2-H	295.15	M+NH4	C11H19NO7	0.2	3.2	3		+	3	Acyclic nitrile glycoside	161.0440 (100.0%, -161.07); 188.0564 (45.3%, -134.06); 246.0995 (16.2%, -76.01); 276.1083 (49.2%, -46.01)	163.0599 (4.4%,-132.09); 166.0862 (24.1%,-129.06); 200.0917 (5.1%,-95.06); 267.1434 (5.7%,-28.01); 278.1235 (47.7%,-17.03)
29	phenylalanine*	3.35	164.071	M-H	166.086	M+H	C9H11NO2	6.7	5.2	5	11.0 ± 0.2	1.9 ± 0.2	1	Aminoacid	146.0433 (100.0%, -18.03)	120.0807 (13.9%,-46.01); 131.0496 (0.5%,-35.04); 149.0597 (1.4%,-17.03)
30	Unidentified-07	3.4	287.041	M-H	289.056	M+H	C11H12O9	-0.9	14.8	6		2.1 ± 0.1	4	Unidentified	139.0036 (7.8%, -148.04); 151.0002 (9.7%, -136.04); 167.0309 (9.9%, -120.01); 175.0237 (100.0%, -112.02); 183.0303 (20.6%, -104.01); 195.0314 (11.4%, -92.01); 209.0107 (42.9%, -78.03); 225.0432 (14.2%, -62.00); 239.0189 (82.0%, -48.02); 269.0302 (74.0%, -18.01)	120.0806 (8.5%,-168.98); 131.0499 (0.3%,-158.01); 149.0600 (0.9%,-140.00); 166.0863 (100.0%,-122.97); 182.0811 (0.2%,-106.97); 200.0917 (0.5%,-88.96); 267.1439 (0.3%,-21.91)
31	galloyl-Hex-dHex?	3.48	477.125	M-H	479.139	M+H	C19H26O14	0.2	6.1	7	2.1 ± 0.3		3	Gallic acid derivative	125.0234 (16.3%, -352.10); 151.0019 (18.3%, -326.12); 168.0061 (5.4%, -309.12); 235.0250 (14.6%, -242.10); 271.0461 (5.7%, -206.08); 331.0664 (7.0%, -146.06); 339.0726 (16.2%, -138.05); 357.0825 (5.4%, -120.04); 459.1149 (100.0%, -18.01)	145.0494 (5.6%,-334.09); 163.0600 (6.8%,-316.08); 262.1283 (49.5%,-217.01); 277.1393 (14.5%,-202.00); 280.1582 (12.5%,-198.98); 309.1183 (6.0%,-170.02); 317.0871 (8.5%,-162.05); 325.1130 (5.0%,-154.03); 333.0818 (7.7%,-146.06); 422.1655 (8.7%,-56.97)
32	lotaustralin-1?	3.53	306.119	M+CH2O2-H	279.155	M+NH4	C11H19NO6	0	1	4	1.4 ± 0.1	1.3 ± 0.1	3	Acyclic nitrile glycoside	145.0512 (6.5%, -161.07); 161.0450 (100%, -145.07); 188.0559 (54.4%, -118.06); 260.1134 (17.8%, -46.01)	127.0397 (1.0%,-152.12); 145.0495 (5.7%,-134.11); 163.0601 (5.2%,-116.09); 171.0288 (1.2%,-108.13); 180.0864 (1.9%,-99.07); 220.0817 (1.0%,-59.07); 226.1074 (0.7%,-53.05); 249.1331 (1.7%,-30.02); 260.1128 (5.2%,-19.04); 263.1317 (5.8%,-16.02)
33	Unidentified-08	3.58	323.135	M-H	325.149	M+H	C13H24O9	-0.2	17.5	2	1.1 ± 0.3		4	Unidentified	119.0327 (45.4%, -204.10); 143.0684 (100.0%, -180.07); 149.0261 (15.1%, -174.11); 161.0445 (36.3%, -162.09); 164.0632 (15.1%, -159.07); 179.0555 (84.1%, -144.08); 279.1386 (18.3%, -44.00)	145.0858 (25.4%,-180.06); 163.0964 (100.0%,-162.05); 173.0808 (59.6%,-152.07); 207.0316 (19.2%,-118.12); 210.1122 (67.5%,-115.04); 217.1067 (24.4%,-108.04); 249.1329 (71.9%,-76.02); 277.1392 (25.7%,-48.01); 307.1384 (25.2%,-18.01)
34	rodiolinozide/pleoside?	3.64	343.103	M-H	362.144	M+NH4	C15H20O9	0	22.7	6	+		3	Phenylethane glycoside	181.0168 (5.4%, -162.09)	157.0496 (15.5%,-205.09); 243.1814 (11.9%,-118.96); 248.1129 (12.9%,-114.03); 257.2472 (24.2%,-104.90); 319.1018 (14.9%,-43.04)
35	O-caffeoylglucarate?	3.72	371.062	M-H			C15H16O11	-0.8	21.1	8		+	3	Phenylpropanoid derivative	191.0202 (16.5%, -180.04); 209.0306 (100.0%, -162.03)
36	Unidentified-09	3.77	335.135	M-H	354.176	M+NH4	C14H24O9	0.5	17.4	3	0.9 ± 0.0		4	Unidentified	95.7450 (5.3%, -239.39); 113.0259 (7.7%, -222.11); 119.0334 (6.3%, -216.10); 137.0580 (11.0%, -198.08); 155.0704 (100.0%, -180.06)	219.0322 (27.4%,-135.14); 260.0582 (18.4%,-94.12); 263.1326 (18.4%,-91.04); 279.1546 (62.7%,-75.02); 311.1240 (83.8%,-43.05); 337.1498 (29.4%,-17.03)
37	lotaustralin-2?	3.82	306.119	M+CH2O2-H	279.155	M+NH4	C11H19NO6	0	1	4	0.8 ± 0.1	1.9 ± 0.3	3	Acyclic nitrile glycoside	159.0300 (3.8%, -147.09); 161.0449 (100%, -145.07); 179.0544 (6.2%, -127.06); 188.0563 (46.3%, -118.06); 260.1144 (23.0%, -46.00)	127.0396 (1.3%,-152.12); 137.0596 (1.2%,-142.10); 145.0495 (6.9%,-134.11); 163.0602 (9.4%,-116.09); 173.0265 (1.6%,-106.13); 180.0867 (1.0%,-99.07); 219.0318 (3.1%,-60.12); 236.0585 (1.8%,-43.10); 260.1127 (26.4%,-19.04); 263.1318 (6.9%,-16.02)
38	rhodiocyanoside-A(D)-1?	3.8	304.104	M+CH2O2-H	277.139	M+NH4	C11H17NO6	0.1	14.9	4		1.0 ± 0.1	3	Acyclic nitrile glycoside	112.3385 (17.0%, -191.77); 119.0254 (12.1%, -185.08); 125.0636 (12.9%, -179.04); 161.0450 (71.6%, -143.06); 179.0567 (12.9%, -125.05); 192.9454 (16.3%, -111.16); 201.1044 (14.0%, -103.00); 234.9946 (17.4%, -69.11); 246.0786 (14.8%, -58.03); 260.1143 (100.0%, -43.99)	145.0494 (17.9%,-132.09); 163.0602 (19.4%,-114.08); 173.0264 (3.9%,-104.11); 219.0320 (7.8%,-58.11); 224.0917 (2.4%,-53.05); 236.0587 (5.1%,-41.08); 260.0584 (2.6%,-17.08); 263.1319 (11.4%,-14.01)
39	dihydroxybenzoyl-Hex?	3.81	315.072	M-H	334.113	M+NH4	C13H16O9	-0.5	9.6	6	+	3.0 ± 0.5	3	Benzoic acid derivative	108.0196 (8.5%, -207.05); 133.0272 (6.0%, -182.05); 152.0100 (100.0%, -163.06); 163.0397 (11.8%, -152.03); 181.0519 (6.1%, -134.02); 195.0293 (5.9%, -120.04); 225.0386 (11.4%, -90.03)	127.0397 (4.6%,-207.07); 145.0495 (5.2%,-189.06); 155.0338 (5.2%,-179.08); 163.0389 (5.7%,-171.07); 260.1125 (13.9%,-74.00); 263.1318 (5.5%,-70.98); 277.1393 (36.1%,-56.97); 280.1581 (11.4%,-53.96); 305.1234 (8.6%,-28.99); 312.1293 (5.1%,-21.98)
40	sulfoglucosyl-gallate-2?	3.86	411.024	M-H			C13H16O13S	-0.4	9.8	6	+	+	3	Gallic acid derivative	125.0243 (8.3%, -286.00); 169.0129 (100.0%, -242.01); 241.0033 (12.3%, -170.02)
41	beta-glucogallin-2	3.92	331.067	M-H	333.082	M+H	C13H16O10	-0.4	4	6	4.5 ± 0.4	1.6 ± 0.2	3	Gallic acid derivative	125.0228 (10.3%, -206.04); 169.0135 (100.0%, -162.05)	155.0339 (4.3%,-178.05); 171.0289 (35.6%,-162.05); 193.1071 (3.5%,-139.97); 203.0553 (5.3%,-130.03); 227.1024 (5.1%,-105.98); 232.0276 (5.1%,-101.05); 243.1701 (8.8%,-89.91); 282.1549 (2.8%,-50.93); 293.1229 (3.7%,-39.96); 315.0714 (7.0%,-18.01)
42	pantothenate?	4.01	218.103	M-H	220.118	M+H	C9H17NO5	0.9	38.8	2	+	+	3	Organic acid	111.0125 (15.7%, -107.09); 117.0147 (14.9%, -101.09); 129.0085 (19.4%, -89.09); 146.0623 (14.6%, -72.04); 154.9968 (12.3%, -63.11); 159.6589 (15.3%, -58.44); 166.1665 (13.4%, -51.94); 171.0298 (11.9%, -47.07); 200.0866 (11.9%, -18.02)	145.0491 (8.1%,-75.07); 149.0806 (9.4%,-71.04); 195.1225 (100.0%,-25.00); 200.0915 (5.2%,-20.03)
44	hydroxymethylbutanoate-Hex-2?	4.06	279.109	M-H	298.069	M+NH4	C11H20O8	-0.5	15.3	2	+		3	Acyclic acid glycoside	83.3960 (14.6%, -195.71); 113.0204 (85.4%, -166.09); 117.0489 (21.0%, -162.06); 131.0324 (15.5%, -148.08); 157.0400 (18.0%, -122.07); 161.0335 (15.0%, -118.08); 173.0553 (16.7%, -106.05); 179.0564 (100.0%, -100.05); 209.0753 (16.3%, -70.03)	145.0492 (1.7%,-153.02); 206.1385 (5.8%,-91.93); 220.1177 (1.9%,-77.95); 242.0843 (0.8%,-55.98); 257.2471 (1.4%,-40.82); 261.1159 (11.9%,-36.95); 277.1392 (100.0%,-20.93); 282.0948 (4.2%,-15.97)
45	vanilloyl-Hex-Hex?	4.12	491.141	M-H	493.155	M+H	C20H28O14	0.2	29.5	7	+		3	Benzoic acid derivative	167.0336 (7.7%, -324.11); 209.0457 (100.0%, -282.09); 233.0460 (6.2%, -258.09); 239.0565 (63.1%, -252.08); 251.0570 (9.1%, -240.08); 371.0979 (38.7%, -120.04); 401.1086 (20.4%, -90.03)	117.0543 (17.6%,-376.10); 145.0492 (34.2%,-348.11); 163.0600 (100.0%,-330.09); 180.0865 (22.0%,-313.07); 203.0548 (9.9%,-290.10); 298.1498 (19.4%,-195.01); 331.1020 (40.1%,-162.05); 378.0241 (10.4%,-115.13); 411.1857 (21.5%,-81.97); 428.2122 (30.9%,-64.94)
46	hydroxymethylglutarate?	4.17	161.044	M-H	180.086	M+NH4	C6H10O5	6.4	8.1	2	4.9 ± 0.3	+	3	Organic acid	143.0331 (100.0%, -18.01)	117.0542 (13.0%,-63.03); 127.0397 (7.4%,-53.05); 145.0493 (31.5%,-35.04); 163.0599 (100.0%,-17.03)
49	pantothenate-Hex?	4.52	380.156	M-H	382.17	M+H	C15H27NO10	-0.1	29.6	3	+	+	3	Organic acid	146.0835 (18.7%, -234.07); 179.0514 (11.9%, -201.10); 193.8407 (15.5%, -186.32); 200.0940 (18.7%, -180.06); 235.9434 (16.3%, -144.21); 263.1157 (12.3%, -117.04); 308.1342 (100.0%, -72.02); 362.1406 (27.4%, -18.02)	220.1177 (38.0%,-162.05); 265.1066 (19.9%,-117.06); 318.1548 (33.4%,-64.02); 325.1855 (100.0%,-56.98); 342.2117 (32.0%,-39.96); 363.1410 (73.0%,-19.03)
50	galloyl-malate?	4.62	285.026	M-H			C11H10O9	-1.1	16	7	+	+	3	Gallic acid derivative	115.0015 (27.7%, -170.02); 133.0123 (100.0%, -152.01); 169.0128 (12.0%, -116.01)
51	Unidentified-11	4.71	353.136	M+CH2O2-H			C12H22NO8	-8.3	23	2.5	+	+	4	Unidentified	124.0398 (18.4%, -229.10); 134.0574 (20.9%, -219.08); 138.0542 (62.4%, -215.08); 183.0542 (19.3%, -170.08); 231.1141 (100.0%, -122.02); 255.1160 (17.8%, -98.02); 273.1252 (60.1%, -80.01); 291.1343 (24.6%, -62.00); 307.0056 (32.0%, -46.13)
52	hydroxyacetophenone-Hex/pungenin?	4.82	313.093	M-H	332.134	M+NH4	C14H18O8	-0.9	16.8	6	+	+	3	Acetophenone derivative	100.7601 (20.9%, -212.33); 103.8170 (24.0%, -209.28); 114.0297 (27.9%, -199.06); 124.0655 (34.1%, -189.03); 153.0180 (100.0%, -160.08); 161.0463 (27.1%, -152.05); 195.9857 (20.2%, -117.11); 203.0738 (22.5%, -110.02); 253.1085 (19.4%, -59.98); 267.1108 (21.7%, -45.98)	122.0966 (42.1%,-210.04)
53	dihomocitrate?	4.96	219.051	M-H	238.092	M+NH4	C8H12O7	0.5	0.8	3	7.4 ± 0.0	6.0 ± 0.4	3	Organic acid	111.0069 (61.3%, -108.04); 129.0180 (14.6%, -90.03); 154.9976 (54.9%, -64.05); 158.0539 (5.0%, -61.00); 173.0085 (100.0%, -46.04); 201.0408 (6.3%, -18.01)	129.0189 (1.6%,-109.07); 147.0440 (8.2%,-91.05); 157.0131 (7.1%,-81.08); 170.0812 (0.6%,-68.01); 175.0237 (24.8%,-63.07); 185.0444 (3.5%,-53.05); 203.0550 (22.5%,-35.04); 221.0655 (100.0%,-17.03)
54	Unidentified-12	4.96	355.067	M-H			C15H16O10	-0.6	4.9	8	1.8 ± 0.0	1.6 ± 0.1	4	Unidentified	119.0494 (7.3%, -236.02); 129.0100 (7.1%, -226.06); 147.0278 (15.9%, -208.04); 163.0386 (20.5%, -192.03); 177.0230 (7.1%, -178.04); 190.9975 (7.9%, -164.07); 209.0308 (100.0%, -146.04); 223.9490 (8.4%, -131.12); 231.0665 (7.3%, -124.00); 255.0006 (11.9%, -100.07)
56	coumaroyl-HexA-1?	5.31	355.067	M-H	374.108	M+NH4	C15H16O10	-0.1	12.7	8	16.4 ± 0.1	10.3 ± 0.2	3	Phenylpropanoid derivative	147.0278 (7.6%, -208.04); 163.0388 (14.4%, -192.03); 191.0200 (43.4%, -164.05); 209.0304 (100.0%, -146.04)	119.0489 (2.3%,-255.06); 135.1013 (19.7%,-239.01); 147.0439 (100.0%,-227.06); 199.0599 (5.5%,-175.05); 220.0816 (2.7%,-154.03); 305.9909 (2.1%,-68.12); 318.1555 (1.6%,-55.95); 339.0709 (41.6%,-35.04); 357.0814 (83.9%,-17.03)
57	syringoyl-Hex-1?	5.36	359.098	M-H	361.112	M+H	C15H20O10	0	2.8	6		3.3 ± 0.1	3	Benzoic acid derivative	138.0302 (7.6%, -221.07); 153.0543 (9.4%, -206.04); 182.0221 (24.7%, -177.08); 197.0458 (100.0%, -162.05)	140.0462 (2.3%,-221.07); 147.0436 (14.6%,-214.07); 155.0700 (7.5%,-206.04); 180.0861 (4.0%,-181.03); 199.0597 (100.0%,-162.05); 281.0991 (7.2%,-80.01); 339.0705 (3.8%,-22.04); 343.1019 (4.0%,-18.01); 347.0970 (3.6%,-14.02)
59	Unidentified-15	5.59	447.115	M-H			C18H24O13	-0.9	16.8	7	+		4	Unidentified	125.0222 (12.2%, -322.09); 151.0025 (11.7%, -296.11); 169.0144 (9.6%, -278.10); 301.0569 (6.5%, -146.06); 339.0722 (8.7%, -108.04); 429.1044 (100.0%, -18.01)
60	coumaroyl-HexA-2?	5.64	355.067	M-H			C15H16O10	-0.6	20.4	8	+		3	Phenylpropanoid derivative	111.7588 (6.1%, -243.31); 119.0549 (5.8%, -236.01); 147.0279 (6.6%, -208.04); 163.0364 (5.8%, -192.03); 191.0151 (14.1%, -164.05); 209.0300 (100.0%, -146.04); 263.1060 (5.7%, -91.96); 283.0211 (10.0%, -72.05); 310.0174 (5.7%, -45.05)
61	tryptophan*	5.7	203.083	M-H	205.097	M+H	C11H12N2O2	-0.6	11.4	7	7.3 ± 0.3	3.0 ± 0.1	1	Aminoacid	116.0489 (100.0%, -87.03); 130.0652 (6.5%, -73.02); 142.0643 (32.1%, -61.02); 159.0915 (45.1%, -43.99); 185.0750 (5.0%, -18.01)	132.0811 (0.3%,-73.02); 144.0804 (0.4%,-61.02); 151.0752 (0.3%,-54.02); 159.0917 (1.0%,-46.01); 169.0859 (0.2%,-36.01); 188.0703 (74.4%,-17.03)
62	aminobenzoyl-Hex-1?	5.88	300.109	M-H	302.123	M+H	C13H19NO7	-1.3	14.3	5	+	+	3	Benzoic acid derivative	123.0297 (14.1%, -177.08); 129.7686 (10.3%, -170.34); 138.0535 (100.0%, -162.06); 180.0652 (17.4%, -120.04); 255.2327 (5.2%, -44.88)	166.0579 (4.5%,-136.07); 182.0806 (2.8%,-120.04); 289.0486 (4.7%,-13.07)
63	gentisoyl-Pent?	5.92	285.062	M-H			C12H14O8	-0.3	19.4	6		0.6 ± 0.1	3	Benzoic acid derivative	151.0372 (9.0%, -134.02); 165.0178 (5.2%, -120.04)
64	caffeoyl-Hex?	5.92	341.088	M-H			C15H18O9	0.3	20	7		+	3	Phenylpropanoid derivative	135.0429 (12.2%, -206.04); 179.0351 (100.0%, -162.05)
65	coumaroyl-Hex-1?	6.02	371.098	M+CH2O2-H			C15H18O8	-0.2	1	7	6.5 ± 0.0	1.4 ± 0.1	3	Phenylpropanoid derivative	119.0481 (12.1%, -252.05); 163.0391 (100.0%, -208.06)
66	Unidentified-16	6.03	263.114	M-H			C11H20O7	0.2	12.5	2	1.0 ± 0.1	0.9 ± 0.0	4	Unidentified	161.0445 (5.7%, -102.07); 221.1032 (100.0%, -42.01)
67	aminobenzoyl-Hex-2?	6.05	300.109	M-H	302.123	M+H	C13H19NO7	-0.8	14.5	5	+	+	3	Benzoic acid derivative	123.0297 (14.1%, -177.08); 129.7686 (10.3%, -170.34); 138.0535 (100.0%, -162.06); 180.0652 (17.4%, -120.04); 255.2327 (5.2%, -44.88)	114.0909 (10.8%,-188.03); 237.1330 (5.9%,-64.99); 254.1592 (5.9%,-47.96)
68	Unidentified-17	6.23	355.067	M-H	374.108	M+NH4	C15H16O10	0.1	3.7	8	12.1 ± 0.2	8.7 ± 0.1	4	Unidentified	191.0195 (19.8%, -164.05); 209.0301 (100.0%, -146.04)	147.0438 (100.0%,-227.06); 213.1120 (3.3%,-161.00); 243.0858 (3.5%,-131.02); 265.1069 (3.5%,-109.00); 281.1591 (5.2%,-92.95); 301.1282 (4.6%,-72.98); 318.1544 (20.1%,-55.95); 339.0708 (46.7%,-35.04); 357.0814 (27.6%,-17.03)
69	Unidentified-18	6.3	333.065	M-H			C13H18O8S	-0.5	31.3	5	+		4	Unidentified	209.1182 (100.0%, -123.95); 253.1080 (73.2%, -79.96)
70	Unidentified-19	6.49	355.067	M-H			C15H16O10	-0.2	6.1	8	+	+	4	Unidentified	191.0196 (32.3%, -164.05); 209.0302 (100.0%, -146.04)
71	syringoyl-Hex-2?	6.54	359.098	M-H	361.112	M+H	C15H20O10	0.8	2.7	6		1.7 ± 0.2	3	Benzoic acid derivative	153.0538 (6.4%, -206.04); 181.0138 (5.6%, -178.08); 195.0661 (5.2%, -164.03); 211.0606 (22.1%, -148.04); 224.0329 (8.4%, -135.07); 239.0560 (96.8%, -120.04); 269.0669 (11.0%, -90.03); 299.0773 (22.4%, -60.02); 344.0748 (24.4%, -15.02)	140.0464 (2.4%,-221.07); 155.0700 (6.8%,-206.04); 167.0700 (2.0%,-194.04); 177.0543 (11.0%,-184.06); 181.0492 (3.2%,-180.06); 199.0597 (100.0%,-162.05); 234.1331 (2.5%,-126.98); 324.1650 (2.2%,-36.95); 343.1021 (4.0%,-18.01)
72	O-feruloylgalactarate?	6.6	385.077	M-H			C16H18O11	0.2	22	8		0.6 ± 0.0	3	Phenylpropanoid derivative	129.0169 (12.2%, -256.06); 134.0362 (6.6%, -251.04); 149.0593 (6.5%, -236.02); 191.0201 (100.0%, -194.06); 209.0300 (69.8%, -176.05)
73	Unidentified-20	6.73	371.098	M-H			C16H20O10	0.8	2.3	7		0.7 ± 0.1	4	Unidentified	191.0346 (27.5%, -180.06); 209.0451 (100.0%, -162.05)
74	Unidentified-21	6.74	451.218	M+CH2O2-H	424.254	M+NH4	C19H34O9	0.2	23.7	3	+		4	Unidentified	162.0451 (6.0%, -289.17); 167.1067 (37.7%, -284.11); 179.0490 (9.6%, -272.17); 207.1387 (18.2%, -244.08); 225.1499 (23.3%, -226.07); 243.1628 (19.0%, -208.06); 387.2029 (39.2%, -64.02); 405.2140 (100.0%, -46.00)	209.1533 (55.1%,-215.10); 217.0702 (43.5%,-207.18); 252.1075 (28.6%,-172.15); 294.6374 (29.0%,-129.62); 302.1237 (54.2%,-122.13); 328.1965 (41.2%,-96.06); 333.1519 (30.1%,-91.10); 339.2011 (21.8%,-85.05); 371.2064 (21.2%,-53.05); 407.2272 (75.6%,-17.03)
75	Unidentified-22	6.88	507.115	M-H	526.155	M+NH4	C23H24O13	-0.1	8.1	12	+		4	Unidentified	135.0279 (8.1%, -372.09); 149.0222 (5.5%, -358.09); 176.0099 (6.3%, -331.10); 204.0063 (6.4%, -303.11); 327.0892 (5.8%, -180.03); 333.0989 (9.9%, -174.02); 345.0977 (11.5%, -162.02); 359.0791 (5.2%, -148.04); 371.0775 (100.0%, -136.04); 389.0884 (6.5%, -118.03)	147.0441 (37.2%,-379.11); 313.0554 (32.2%,-213.10); 325.0920 (53.7%,-201.06); 357.0817 (20.2%,-169.07); 374.1084 (80.6%,-152.05); 472.1742 (23.0%,-53.98); 480.2076 (21.6%,-45.95); 491.1185 (100.0%,-35.04)
76	acetyl-hydroxymethyl-phenyl-Hex?	6.89	327.109	M-H	346.149	M+NH4	C15H20O8	-0.3	18	6	0.5 ± 0.1		2	Phenol derivative	147.0444 (8.8%, -180.06); 165.0553 (100.0%, -162.05); 283.2627 (8.4%, -43.85)	167.0700 (12.6%,-179.08); 178.1336 (4.5%,-168.02); 216.1224 (4.3%,-130.03); 233.0800 (8.7%,-113.07); 243.0858 (6.9%,-103.06); 256.2377 (8.8%,-89.91); 275.0907 (8.6%,-71.06); 293.1013 (5.1%,-53.05); 310.1859 (4.5%,-35.96); 329.1228 (17.0%,-17.03)
77	Unidentified-23	7.01	369.14	M-H			C14H26O11	0.6	21.5	2	+		4	Unidentified	147.0153 (9.5%, -222.12); 161.0453 (28.0%, -208.09); 165.0358 (5.0%, -204.10); 173.0861 (8.9%, -196.05); 263.1125 (100.0%, -106.03); 291.1088 (27.9%, -78.03)
78	gallocatechin*	7.08	305.067	M-H	307.081	M+H	C15H14O7	-1.1	14	9	+		1	Flavanol	125.0245 (49.7%, -180.04); 139.0388 (18.7%, -166.03); 155.8491 (20.1%, -149.22); 165.0182 (59.0%, -140.05); 177.0545 (17.2%, -128.01); 204.0396 (20.6%, -101.03); 219.0671 (100.0%, -86.00); 237.0766 (31.3%, -67.99); 243.0683 (20.6%, -62.00); 261.0772 (85.6%, -43.99)	142.0861 (1.7%,-165.00); 163.0964 (3.4%,-143.98); 184.0965 (2.1%,-122.98); 286.1288 (1.7%,-20.95)
80	Unidentified-25	7.17	355.161	M-H			C14H28O10	-1	20.8	1	+		4	Unidentified	163.0397 (13.2%, -192.12); 181.0739 (8.6%, -174.09); 187.0406 (8.8%, -168.12); 191.0206 (45.8%, -164.14); 209.0295 (100.0%, -146.13); 217.0452 (9.3%, -138.12); 235.0607 (23.8%, -120.10); 268.0787 (8.4%, -87.08); 309.1531 (13.2%, -46.01)
81	dihydrophaseate-Hex?	7.22	443.192	M-H			C21H32O10	0.1	24.5	6	+	+	3	Sesquiterpenoid derivative	113.0207 (29.3%, -330.17); 179.0546 (42.4%, -264.14); 189.1279 (24.1%, -254.06); 219.1410 (43.2%, -224.05); 237.1492 (100.0%, -206.04); 263.1299 (43.2%, -180.06); 281.1392 (84.7%, -162.05); 307.1559 (20.9%, -136.04); 404.1574 (57.8%, -39.03)
82	hydroxy-methoxybenzoyl-Hex-Hex-1?	7.25	491.141	M-H			C20H28O14	-0.1	31.6	7	+		3	Benzoic acid derivative	209.0449 (14.9%, -282.10); 239.0556 (11.9%, -252.09); 251.0559 (100.0%, -240.08); 263.0565 (6.1%, -228.08); 281.0668 (92.9%, -210.07); 293.0655 (6.2%, -198.08); 311.0782 (25.4%, -180.06); 353.0901 (5.1%, -138.05); 383.0988 (6.0%, -108.04)
83	epigallocatechin-epigallocatechin-gallate?	7.25	761.136	M-H	763.149	M+H	C37H30O18	0.1	15.5	23	1.2 ± 0.3	3.0 ± 0.4	3	Dimeric proanthocyanidin	125.0231 (8.8%, -636.11); 177.0188 (25.4%, -584.12); 217.0497 (9.3%, -544.09); 243.0296 (17.4%, -518.11); 261.0404 (17.7%, -500.10); 269.0454 (11.5%, -492.09); 287.0560 (13.6%, -474.08); 301.0350 (9.8%, -460.10); 305.0667 (63.3%, -456.07); 423.0721 (100.0%, -338.06)	151.0752 (6.1%,-612.07); 177.0544 (5.1%,-586.09); 195.0650 (12.8%,-568.08); 257.1858 (5.5%,-505.96); 295.1193 (4.7%,-468.03); 312.1664 (4.4%,-450.98); 331.1386 (7.3%,-432.01); 348.1652 (32.0%,-414.98); 374.1448 (7.1%,-389.00); 493.1551 (31.4%,-269.99)
84	hydroxy-methoxybenzoyl-Hex-Hex-2?	7.37	491.14	M-H	493.155	M+H	C20H28O14	0.3	21.6	7	0.8 ± 0.2	2.0 ± 0.3	3	Benzoic acid derivative	209.0453 (14.4%, -282.10); 239.0559 (10.6%, -252.08); 251.0560 (100.0%, -240.08); 263.0564 (5.1%, -228.08); 281.0665 (86.6%, -210.07); 293.0668 (6.7%, -198.07); 311.0772 (30.1%, -180.06); 353.0876 (6.5%, -138.05); 383.0994 (5.3%, -108.04)	195.0645 (8.1%,-298.09); 261.1118 (8.0%,-232.04); 295.1179 (4.7%,-198.04); 301.1280 (4.2%,-192.03); 318.1545 (6.5%,-175.00); 331.1387 (5.9%,-162.02); 348.1652 (28.4%,-144.99); 374.1438 (4.9%,-119.01); 473.2234 (4.1%,-19.93)
86	Unidentified-27	7.52	355.067	M-H	374.108	M+NH4	C15H16O10	-0.9	3.8	8	1.4 ± 0.2	1.4 ± 0.2	4	Unidentified	191.0201 (21.2%, -164.05); 209.0303 (100.0%, -146.04)	147.0438 (37.9%,-227.06); 188.0704 (14.5%,-186.04); 217.0974 (8.6%,-157.01); 261.0865 (32.1%,-113.02); 311.1696 (10.5%,-62.94); 328.1966 (85.9%,-45.91); 333.1517 (11.1%,-40.96); 339.1548 (100.0%,-34.95)
87	hydroxybenzoyl-Hex-HexA?	7.53	475.109	M-H			C19H24O14	0.6	14.1	8		0.8 ± 0.0	3	Benzoic acid derivative	182.0224 (11.2%, -293.09); 197.0454 (100.0%, -278.06); 359.0973 (11.5%, -116.01)
88	melilotoside-1?	7.9	325.093	M-H	344.133	M+NH4	C15H18O8	-0.5	2.1	7	3.6 ± 0.4	5.0 ± 0.7	3	Phenylpropanoid derivative	119.0486 (28.4%, -206.04); 163.0388 (100.0%, -162.05)	147.0436 (61.2%,-197.09); 165.0543 (100.0%,-179.08); 209.1531 (14.8%,-134.98); 227.1634 (3.9%,-116.97); 246.0791 (3.2%,-98.05); 305.1590 (2.1%,-38.97); 309.0966 (12.4%,-35.04); 327.1070 (13.0%,-17.03)
89	tetrahydroxymegastigmanen-Hex?	7.97	451.218	M+CH2O2-H	424.254	M+NH4	C19H34O9	0.2	4.1	3	5.6 ± 0.5	+	3	Megastigmane glycoside	119.0319 (9.0%, -332.19); 149.0963 (12.6%, -302.12); 153.0899 (8.0%, -298.13); 161.0446 (9.6%, -290.17); 167.1069 (100.0%, -284.11); 179.0568 (21.8%, -272.16); 207.1386 (6.4%, -244.08); 225.1495 (23.2%, -226.07); 243.1605 (49.4%, -208.06); 405.2128 (75.4%, -46.01)	163.1480 (2.4%,-261.11); 167.0339 (2.4%,-257.22); 173.1324 (2.0%,-251.12); 191.1428 (5.4%,-233.11); 209.1533 (100.0%,-215.10); 227.0910 (2.3%,-197.16); 353.1956 (2.7%,-71.06); 371.2062 (14.6%,-53.05); 389.2168 (24.7%,-35.04)
90	digalloylglucose?	8.04	483.078	M-H			C20H20O14	-0.2	7.2	11	+	+	3	Gallic acid derivative	169.0136 (11.1%, -314.06); 271.0449 (12.7%, -212.03); 313.0563 (85.3%, -170.02); 439.0881 (100.0%, -43.99); 465.0679 (23.1%, -18.01)
92	Unidentified-28	8.17	355.067	M-H			C15H16O10	-0.4	10.6	8	+		4	Unidentified	177.0550 (5.7%, -178.01); 191.0204 (32.3%, -164.05); 195.0665 (34.1%, -160.00); 209.0305 (100.0%, -146.04)
93	dihydrofeluloyl-Hex?	8.18	357.119	M-H	376.16	M+NH4	C16H22O9	0.7	20.5	6		0.5 ± 0.1	2	Phenylpropanoid derivative	177.0559 (7.1%, -180.06); 195.0660 (100.0%, -162.05)	137.0593 (9.3%,-239.10); 147.0437 (2.9%,-229.12); 179.0699 (9.6%,-197.09); 197.0805 (13.4%,-179.08); 224.1275 (3.7%,-152.03); 245.1375 (2.8%,-131.02); 269.0477 (3.9%,-107.11); 315.0541 (3.4%,-61.11); 319.1290 (4.9%,-57.03); 322.1860 (5.3%,-53.97)
95	aminobenzoyl-Hex-3?	8.37	346.114	M+CH2O2-H	302.123	M+H	C13H19NO7	0.1	17.8	5	+	+	3	Benzoic acid derivative	138.0528 (18.2%, -208.06); 300.1090 (100.0%, -46.01)	140.0704 (3.1%,-162.05); 163.0602 (5.9%,-139.06); 182.0809 (8.8%,-120.04); 206.0808 (4.1%,-96.04); 222.0756 (3.0%,-80.05); 248.0906 (2.1%,-54.03); 266.1022 (3.9%,-36.02); 284.1126 (9.2%,-18.01); 289.0832 (2.3%,-13.04)
96	methoxyhydroxyphenyl-galloyl-Hex?	8.73	453.104	M-H			C20H22O12	-1.1	17.8	10	+		3	Gallic acid derivative	121.7651 (11.1%, -331.34); 125.0241 (11.5%, -328.08); 169.0140 (37.5%, -284.09); 183.0348 (12.4%, -270.07); 241.0358 (22.8%, -212.07); 285.0630 (30.5%, -168.04); 313.0569 (100.0%, -140.05); 327.0743 (21.0%, -126.03); 331.0714 (11.5%, -122.03); 438.0824 (15.3%, -15.02)
97	digalloyl-Hex?	8.79	483.079	M-H			C20H20O14	-1	7.5	11	1.0 ± 0.2		3	Gallic acid derivative	169.0137 (53.5%, -314.06); 313.0569 (100.0%, -170.02); 331.0682 (14.8%, -152.01)
98	methyl-paederosidic_acid?	8.87	477.107	M-H			C19H26O12S	-0.2	10.5	7	1.4 ± 0.4		3	Dimeric iridoid derivative	161.0444 (6.9%, -316.06); 190.1000 (90.6%, -287.01); 203.1077 (5.9%, -274.00); 233.1184 (52.7%, -243.99); 245.1183 (22.7%, -231.99); 353.1611 (33.9%, -123.95); 397.1506 (25.1%, -79.96)
100	Unidentified-30	9.11	327.109	M-H			C15H20O8	-0.9	10.1	6	+		4	Unidentified	119.0558 (13.9%, -208.05); 147.0044 (13.4%, -180.10); 158.3105 (10.1%, -168.80); 165.0550 (44.1%, -162.05); 182.9968 (100.0%, -144.11); 189.0559 (17.2%, -138.05); 202.3837 (11.8%, -124.73); 248.0563 (12.2%, -79.05); 282.2514 (10.5%, -44.86)
101	methyl-heptenol-Hex/creoside-2?	9.11	351.166	M+CH2O2-H	324.201	M+NH4	C14H26O7	1.6	0.8	2		0.7 ± 0.1	3	Acyclic alcohol glycoside	113.0206 (10.3%, -238.14); 129.0175 (6.2%, -222.15); 161.0442 (13.7%, -190.12); 189.1099 (6.6%, -162.06); 222.4876 (6.0%, -128.68); 243.1153 (9.9%, -108.05); 271.1075 (25.1%, -80.06); 304.1333 (15.7%, -47.03); 318.0896 (9.1%, -33.08)	127.1121 (19.0%,-197.09); 160.1329 (2.4%,-164.07); 289.1640 (7.1%,-35.04); 305.1495 (8.1%,-19.05); 308.1783 (16.6%,-16.02)
103	Unidentified-32	9.13	775.152	M-H	777.164	M+H	C38H32O18	-0.3	6.7	23	3.6 ± 0.6		4	Unidentified	125.0226 (7.9%, -650.13); 177.0190 (26.1%, -598.13); 243.0298 (6.7%, -532.12); 261.0400 (6.4%, -514.11); 269.0458 (10.5%, -506.11); 301.0719 (16.5%, -474.08); 319.0825 (83.4%, -456.07); 387.0512 (12.2%, -388.10); 411.1086 (6.7%, -364.04); 437.0879 (100.0%, -338.06)	346.1491 (2.5%,-431.02); 356.0972 (5.5%,-421.07); 439.2170 (5.3%,-337.95); 456.2433 (2.3%,-320.92); 485.1283 (10.9%,-292.04); 502.1559 (1.7%,-275.01); 579.1495 (3.7%,-198.01); 617.1128 (5.4%,-160.05); 634.1387 (3.4%,-143.03)
104	octenol-Hex-Pent-1/ebracteatoside-D?	9.2	483.208	M+CH2O2-H	439.217	M+H	C19H34O11	0.5	27	3		+	3	Acyclic alcohol glycoside	149.0436 (28.2%, -334.16); 163.0386 (100.0%, -320.17); 191.0562 (86.1%, -292.15); 251.0771 (18.3%, -232.13); 313.0541 (23.4%, -170.15); 321.1096 (23.0%, -162.10); 327.0709 (12.7%, -156.14); 339.1182 (14.7%, -144.09); 437.2027 (53.5%, -46.01)	163.0385 (3.5%,-276.18); 181.0493 (6.9%,-258.17); 277.1643 (18.2%,-162.05); 323.0762 (7.8%,-116.14); 356.0973 (8.2%,-83.12); 360.1282 (10.8%,-79.09); 408.1795 (4.8%,-31.04)
105	feruloyl-Hex?	9.27	355.104	M-H	374.144	M+NH4	C16H20O9	-0.6	19.5	7	+	0.9 ± 0.0	3	Phenylpropanoid derivative	134.0354 (7.8%, -221.07); 160.0159 (8.9%, -195.09); 175.0396 (71.4%, -180.06); 193.0509 (100.0%, -162.05)	177.0542 (35.8%,-197.09); 195.0649 (61.9%,-179.08); 209.1534 (5.5%,-164.99); 342.2744 (3.9%,-31.87); 357.1178 (6.5%,-17.03)
106	naringenin-di-C-Hex?	9.28	595.166	M-H	597.181	M+H	C27H32O15	1.1	9.1	12		0.8 ± 0.2	3	Flavanone derivative	313.0715 (14.9%, -282.09); 343.0822 (8.1%, -252.08); 355.0821 (99.4%, -240.08); 385.0925 (100.0%, -210.07); 397.0924 (7.6%, -198.07); 415.1032 (33.2%, -180.06); 457.1140 (11.3%, -138.05); 475.1239 (14.9%, -120.04); 487.1244 (8.8%, -108.04); 505.1349 (7.1%, -90.03)	177.0543 (6.0%,-420.13); 195.0648 (11.1%,-402.12); 357.1176 (3.7%,-240.06); 374.1443 (16.6%,-223.04); 417.2345 (3.0%,-179.95); 454.2280 (2.8%,-142.95); 460.2393 (4.3%,-136.94); 477.1388 (2.8%,-120.04); 579.1702 (9.2%,-18.01)
107	Unidentified-33	9.32	491.214	M-H	510.254	M+NH4	C22H36O12	-1	27.2	5	+		4	Unidentified	149.0954 (27.8%, -342.12); 167.1075 (100.0%, -324.11); 207.1380 (35.0%, -284.08); 225.1451 (37.6%, -266.07); 299.0605 (21.5%, -192.15); 387.2041 (22.4%, -104.01); 405.2307 (16.5%, -85.98); 433.0620 (20.7%, -58.15); 447.2310 (24.1%, -43.98)	177.0545 (8.3%,-333.20); 209.1534 (100.0%,-301.10); 335.1133 (8.0%,-175.14); 350.2176 (6.5%,-160.04); 357.1183 (6.4%,-153.14); 457.2070 (19.5%,-53.05); 475.2178 (25.5%,-35.04); 493.2281 (25.8%,-17.03); 497.1654 (12.2%,-13.09)
108	Unidentified-34	9.4	351.166	M-H			C15H28O9	0.8	2.4	2		+	4	Unidentified	157.0180 (28.8%, -194.15); 164.0127 (19.6%, -187.15); 196.9991 (100.0%, -154.17); 234.0760 (22.7%, -117.09); 264.9803 (28.2%, -86.19); 270.0508 (40.5%, -81.11); 288.1736 (20.2%, -62.99); 297.0402 (79.1%, -54.13); 305.1577 (83.4%, -46.01)
109	octenol-Hex-Pent-2/ebracteatoside-D?	9.44	483.208	M+CH2O2-H	439.217	M+H	C19H34O11	0.6	25.7	3	+	+	3	Acyclic alcohol glycoside	132.0343 (16.6%, -351.17); 161.0288 (13.8%, -322.18); 174.0479 (13.4%, -309.16); 226.9637 (25.2%, -256.24); 233.0666 (26.9%, -250.14); 293.0911 (18.6%, -190.12); 305.1602 (100.0%, -178.05); 331.0704 (14.8%, -152.14); 339.1197 (16.2%, -144.09); 437.2039 (81.0%, -46.00)	225.1481 (21.8%,-214.07); 231.0499 (10.0%,-208.17); 259.1535 (39.3%,-180.06); 277.1642 (74.6%,-162.05); 289.0699 (9.3%,-150.15); 295.1020 (55.4%,-144.11); 303.1438 (12.2%,-136.07); 307.1750 (100.0%,-132.04); 421.2065 (31.5%,-18.01)
110	(epi)gallocatechin-catechin-gallate-1?	9.45	745.142	M-H	747.154	M+H	C37H30O17	-1	8	23	6.7 ± 1.5		3	Dimeric proanthocyanidin	125.0231 (12.7%, -620.12); 161.0232 (9.9%, -584.12); 217.0507 (9.7%, -528.09); 243.0299 (18.6%, -502.11); 261.0404 (14.2%, -484.10); 269.0457 (22.7%, -476.10); 287.0561 (33.4%, -458.09); 297.0406 (8.2%, -448.10); 305.0668 (98.0%, -440.07); 423.0720 (100.0%, -322.07)	231.0498 (12.8%,-516.10); 259.1535 (10.1%,-488.00); 295.1023 (13.0%,-452.05); 307.1750 (18.8%,-439.98); 340.1596 (27.3%,-406.99); 362.1234 (19.6%,-385.03); 439.2171 (100.0%,-307.94); 456.2439 (23.8%,-290.91)
111	Unidentified-35	9.5	477.108	M-H			C19H26O12S	-1.3	15.1	7	+		4	Unidentified	164.0471 (6.8%, -313.06); 173.0978 (8.4%, -304.01); 190.1001 (100.0%, -287.01); 233.1182 (13.2%, -243.99); 284.0908 (37.6%, -193.02); 353.1610 (23.1%, -123.95); 397.1504 (55.0%, -79.96)
112	(epi)gallocatechin-(epi)gallocatechin-di-gallate?	9.5	913.147	M-H	915.16	M+H	C44H34O22	-0.2	6.7	28	+	+	3	Dimeric proanthocyanidin	177.0190 (33.2%, -736.13); 261.0401 (19.4%, -652.11); 273.0396 (23.4%, -640.11); 285.0400 (69.8%, -628.11); 303.0512 (16.3%, -610.09); 327.0511 (15.5%, -586.09); 423.0719 (100.0%, -490.07); 435.0728 (16.1%, -478.07); 447.0717 (17.8%, -466.07); 465.0820 (23.2%, -448.06)	213.0756 (6.7%,-702.08); 249.0606 (6.3%,-666.10); 317.0695 (7.4%,-598.09); 340.1603 (10.5%,-575.00); 427.1572 (9.4%,-488.00); 440.2209 (16.3%,-474.94); 451.1237 (9.7%,-464.04); 457.0762 (6.6%,-458.08); 496.1488 (9.6%,-419.01)
113	Unidentified-36	9.52	431.192	M-H			C20H32O10	1.4	5.5	5		3.5 ± 0.5	4	Unidentified	113.0234 (11.4%, -318.17); 121.0619 (11.9%, -310.13); 168.7459 (21.9%, -262.45); 179.0557 (100.0%, -252.14); 311.0566 (14.2%, -120.14); 315.0555 (15.2%, -116.14); 340.0550 (27.1%, -91.14); 344.0619 (18.9%, -87.13); 353.0133 (12.2%, -78.18)
116	octenol-Hex-Pent-3/ebracteatoside-D?	9.76	483.209	M+CH2O2-H	456.243	M+NH4	C19H34O11	-0.5	26.1	3	+	+	3	Acyclic alcohol glycoside	149.0431 (8.5%, -334.16); 161.0444 (7.8%, -322.16); 191.0559 (55.6%, -292.15); 233.0666 (9.8%, -250.14); 305.1605 (7.0%, -178.05); 437.2021 (100.0%, -46.01)	241.1426 (1.9%,-215.10); 259.1536 (9.0%,-197.09); 277.1641 (14.6%,-179.08); 289.0703 (1.8%,-167.17); 295.1022 (12.5%,-161.14); 307.1750 (22.1%,-149.07); 324.2020 (2.0%,-132.04); 421.2064 (7.0%,-35.04); 439.2169 (100.0%,-17.03)
118	Unidentified-40	9.99	467.084	M-H			C20H20O13	-0.9	22.6	11	1.3 ± 0.3		4	Unidentified	169.0131 (6.5%, -298.07); 313.0568 (26.8%, -154.03); 316.0753 (7.3%, -151.01); 423.0937 (100.0%, -43.99); 449.0729 (15.6%, -18.01)
119	epigallocatechin-catechin-gallate-2?	10	745.141	M-H	747.154	M+H	C37H30O17	-0.7	14.2	23	0.6 ± 0.1		3	Dimeric proanthocyanidin	125.0242 (8.1%, -620.12); 177.0187 (24.9%, -568.12); 243.0296 (7.4%, -502.11); 271.0613 (18.9%, -474.08); 289.0718 (69.1%, -456.07); 389.0673 (5.2%, -356.07); 407.0775 (100.0%, -338.06)	291.1798 (6.0%,-455.97); 295.1022 (13.5%,-452.05); 315.0712 (45.9%,-432.08); 393.1513 (10.4%,-354.00); 404.1549 (24.5%,-343.00); 421.1815 (10.2%,-325.97); 439.2171 (69.0%,-307.94); 456.2436 (7.7%,-290.91); 469.0974 (13.6%,-278.06)
121	hydroxymegastigma-dien-one-Hex?	10.13	431.193	M+CH2O2-H	387.201	M+H	C19H30O8	-0.8	9.2	5	1.5 ± 0.3	+	3	Megastigmane glycoside	113.0230 (5.2%, -318.17); 140.5134 (6.0%, -290.68); 152.0823 (5.1%, -279.11); 159.0298 (6.7%, -272.16); 169.0832 (5.7%, -262.11); 179.0594 (7.3%, -252.13); 205.1230 (46.4%, -226.07); 223.1355 (23.0%, -208.06); 359.0832 (6.0%, -72.11); 385.1868 (100.0%, -46.01)	189.1274 (2.8%,-198.07); 207.1379 (100.0%,-180.06); 210.1570 (12.2%,-177.04); 225.1483 (72.7%,-162.05); 291.0865 (27.6%,-96.11); 349.1401 (4.3%,-38.06); 353.1707 (3.6%,-34.03); 359.1703 (5.0%,-28.03); 369.1909 (26.4%,-18.01)
122	crocusatin_C-Hex-Hex?	10.16	491.214	M-H	510.254	M+NH4	C22H36O12	-0.9	7.7	5	0.9 ± 0.0		3	Monoterpene derivative	149.0962 (17.0%, -342.12); 153.0887 (12.5%, -338.13); 161.0457 (7.1%, -330.17); 167.1070 (100.0%, -324.11); 207.1380 (9.2%, -284.08); 225.1502 (15.0%, -266.06); 243.1601 (44.6%, -248.05); 387.2034 (8.0%, -104.01); 405.2125 (22.6%, -86.00); 447.1152 (9.9%, -44.10)	207.1379 (39.1%,-303.12); 210.1570 (7.1%,-300.10); 225.1484 (28.6%,-285.11); 291.0864 (12.7%,-219.17); 369.1906 (10.4%,-141.06); 387.2013 (100.0%,-123.05); 421.1855 (11.4%,-89.07); 439.1963 (29.1%,-71.06); 457.2068 (25.7%,-53.05); 475.2173 (36.6%,-35.04)
123	geranyl-Hex-Pent?/sachaloside-I?	10.17	447.224	M-H			C21H36O10	-0.7	1	4	1.3 ± 0.1		3	Bicyclo[3.1.1] glycoside	125.0209 (21.8%, -322.20); 149.0948 (40.6%, -298.13); 153.0924 (21.9%, -294.13); 167.1054 (97.4%, -280.12); 179.0570 (24.1%, -268.17); 207.1407 (11.2%, -240.08); 243.1611 (50.5%, -204.06); 259.0606 (93.2%, -188.16); 269.0460 (95.9%, -178.18); 287.0578 (100.0%, -160.17)
125	Unidentified-43	10.27	433.208	M+CH2O2-H	406.244	M+NH4	C19H32O8	-0.5	17.6	4	+		4	Unidentified	113.0223 (5.1%, -320.19); 159.0283 (10.9%, -274.18); 189.1318 (7.2%, -244.08); 207.1314 (5.7%, -226.08); 225.1483 (29.6%, -208.06); 229.0874 (8.1%, -204.12); 303.0865 (6.5%, -130.12); 372.1819 (5.6%, -61.03); 387.1325 (9.5%, -46.08)	175.1481 (21.9%,-231.10); 179.0703 (30.6%,-227.17); 191.1433 (5.5%,-215.10); 209.1535 (100.0%,-197.09); 227.1641 (27.1%,-179.08); 249.1119 (26.0%,-157.13); 339.1637 (4.8%,-67.08); 356.1915 (24.1%,-50.05); 371.2273 (5.0%,-35.02); 388.2542 (27.8%,-17.99)
126	(epi-)gallocatechin-gallate?	10.4	457.078	M-H	459.092	M+H	C22H18O11	-1.5	31.4	14	+		2	Gallic acid derivative	125.0235 (17.5%, -332.05); 169.0136 (100.0%, -288.06); 267.0305 (7.2%, -190.05); 270.0514 (8.5%, -187.03); 294.0179 (21.3%, -163.06); 303.0869 (13.5%, -153.99); 415.0822 (8.2%, -42.00); 435.1074 (9.4%, -21.97); 442.0692 (15.7%, -15.01)	179.0703 (60.4%,-280.02); 209.1535 (75.5%,-249.94); 227.1642 (32.4%,-231.93); 249.1120 (49.6%,-209.98); 289.0707 (36.0%,-170.02); 307.1753 (34.4%,-151.92); 353.2167 (25.8%,-105.88); 389.2171 (100.0%,-69.88); 406.2437 (31.5%,-52.85); 439.2174 (21.0%,-19.88)
127	quercetin-3-Hex-7-dHex?/rutin?	10.4	609.145	M-H	611.16	M+H	C27H30O16	1.9	10.2	13		+	3	Flavonol glycoside	301.0383 (14.1%, -308.11); 447.0932 (16.8%, -162.05); 461.0796 (100.0%, -146.07)	307.1750 (100.0%,-303.98); 340.1963 (22.6%,-270.96); 355.2113 (32.1%,-255.95); 373.2218 (31.1%,-237.94); 389.2166 (36.5%,-221.94); 408.2584 (36.1%,-202.90); 439.2167 (90.4%,-171.94); 455.1184 (26.1%,-156.04); 459.0918 (24.9%,-152.07); 465.1023 (22.7%,-146.06)
128	dihydrodihydroxyionol-Hex?	10.46	435.223	M+CH2O2-H	408.259	M+NH4	C19H34O8	2.3	18.7	3		5.9 ± 0.2	3	Megastigmane glycoside	113.0227 (5.3%, -322.20); 161.0426 (17.9%, -274.18); 179.0545 (5.8%, -256.17); 191.0567 (13.9%, -244.17); 227.1643 (100.0%, -208.06); 387.2014 (9.1%, -48.02); 389.2226 (7.6%, -46.00)	137.0960 (6.3%,-271.16); 175.1478 (25.0%,-233.11); 181.0857 (31.5%,-227.17); 193.1583 (83.5%,-215.10); 197.1170 (8.0%,-211.14); 355.2112 (85.2%,-53.05); 359.1697 (14.5%,-49.09); 373.2219 (98.2%,-35.04); 378.1754 (43.9%,-30.08); 391.2322 (9.0%,-17.03)
129	phloretin*	10.49	319.083	M+CH2O2-H			C15H14O5	-0.8	3.1	9	2.0 ± 0.5		1	Dihydrochalcone derivative	165.0189 (10.4%, -154.06); 179.0346 (21.5%, -140.05); 203.0356 (11.7%, -116.05); 217.0525 (12.9%, -102.03); 233.0826 (20.0%, -86.00); 243.0651 (13.8%, -76.02); 251.0933 (17.8%, -67.99); 260.0689 (100.0%, -59.01); 275.0919 (43.8%, -43.99); 301.0700 (9.5%, -18.01)
130	Unidentified-44	10.66	759.157	M-H	761.17	M+H	C38H32O17	-0.9	30.6	23	4.8 ± 0.9		4	Unidentified	169.0136 (7.4%, -590.14); 269.0456 (13.5%, -490.11); 301.0720 (18.4%, -458.08); 319.0826 (100.0%, -440.07); 387.0515 (7.6%, -372.11); 437.0880 (79.6%, -322.07)	231.0496 (54.5%,-530.12); 249.1116 (10.0%,-512.06); 287.1120 (6.4%,-474.06); 305.1231 (34.8%,-456.05); 339.0707 (7.5%,-422.10); 406.2430 (5.1%,-354.93); 414.1968 (19.2%,-346.97); 420.2589 (5.6%,-340.91); 430.2277 (6.0%,-330.94); 600.2640 (6.6%,-160.91)
131	quercetin-3-Hex-dHex-Pent?	10.71	741.187	M-H	743.201	M+H	C32H38O20	1.4	13.8	14		4.9 ± 0.2	3	Flavonol glycoside	299.0194 (41.0%, -442.17); 462.0796 (100.0%, -279.11); 579.1347 (19.0%, -162.05)	231.0496 (7.0%,-512.15); 291.1800 (2.1%,-452.02); 305.1227 (4.7%,-438.08); 340.1598 (14.1%,-403.04); 443.1906 (1.2%,-300.01); 453.2325 (9.1%,-289.97); 465.1022 (3.0%,-278.10); 470.2589 (1.4%,-272.94); 595.1649 (5.6%,-148.04); 611.1599 (3.6%,-132.04)
132	asperuloside?	10.81	413.109	M-H			C18H22O11	0	22.1	8	+		3	Iridoid glycoside	163.0384 (10.1%, -250.07); 237.0750 (6.1%, -176.03); 249.0614 (33.6%, -164.05); 267.0720 (100.0%, -146.04)
133	Unidentified-45	10.93	659.126	M-H	661.139	M+H	C30H28O17	-0.6	31.7	17	+		4	Unidentified	169.0144 (13.1%, -490.11); 177.0187 (7.1%, -482.11); 338.0416 (5.2%, -321.08); 353.0666 (21.7%, -306.06); 371.0777 (100.0%, -288.05)	181.0496 (34.0%,-480.09); 231.0862 (97.8%,-430.05); 266.1232 (78.0%,-395.02); 315.0712 (9.7%,-346.07); 356.1915 (22.2%,-304.95); 400.1386 (9.8%,-261.00); 445.2068 (7.8%,-215.93); 482.2592 (18.8%,-178.88); 558.2180 (14.4%,-102.92)
134	hydroxybenzoyl-HexA?/saliciloyl-HexA?	10.98	313.057	M-H	315.071	M+H	C13H14O9	-0.4	16.4	7	2.1 ± 0.2	2.4 ± 0.2	3	Benzoic acid derivative	153.0537 (11.5%, -160.00); 197.0454 (100.0%, -116.01)	181.0493 (100.0%,-134.02); 197.0805 (1.7%,-117.99); 231.0861 (40.0%,-83.99); 266.1231 (41.8%,-48.95); 271.0787 (1.8%,-43.99); 287.0536 (2.2%,-28.02); 297.0607 (1.2%,-18.01)
135	Unidentified-46	10.99	659.126	M-H			C30H28O17	-0.5	5.5	17	+		4	Unidentified	169.0144 (13.1%, -490.11); 177.0187 (7.1%, -482.11); 338.0416 (5.2%, -321.08); 353.0666 (21.7%, -306.06); 371.0777 (100.0%, -288.05)
136	Unidentified-47	11.12	565.213	M-H			C24H38O15	1	33.3	6	0.6 ± 0.1	+	4	Unidentified	179.1081 (19.1%, -386.11); 223.0973 (100.0%, -342.12); 265.1091 (8.4%, -300.10); 403.1586 (22.9%, -162.05)
137	phenylethyl-Hex-Pent?	11.33	461.166	M+CH2O2-H	434.203	M+NH4	C19H28O10	0.5	16.6	6	+		3	Phenylethane glycoside	131.0346 (6.1%, -330.13); 149.0436 (21.3%, -312.12); 157.0478 (5.2%, -304.12); 191.0557 (25.3%, -270.11); 233.0661 (8.6%, -228.10); 283.1185 (72.6%, -178.05); 329.1522 (16.2%, -132.01); 373.1392 (72.8%, -88.03); 385.1427 (7.9%, -76.02); 415.1612 (100.0%, -46.00)	259.0818 (13.5%,-175.12); 285.1334 (21.7%,-149.07); 295.1028 (38.4%,-139.10); 321.1449 (57.4%,-113.06); 331.1754 (16.8%,-103.03); 353.2172 (16.2%,-80.99); 389.2176 (14.6%,-44.99)
138	Unidentified-48	11.42	789.167	M-H	791.181	M+H	C39H34O18	-0.1	11.2	23	5.4 ± 0.3		4	Unidentified	125.0230 (7.1%, -664.15); 169.0136 (11.2%, -620.15); 177.0190 (38.0%, -612.15); 255.0297 (7.4%, -534.14); 315.0878 (50.8%, -474.08); 333.0984 (87.1%, -456.07); 407.1138 (7.1%, -382.05); 425.1254 (8.4%, -364.04); 433.0932 (73.2%, -356.07); 451.1038 (100.0%, -338.06)	285.1329 (1.5%,-506.05); 302.1599 (6.7%,-489.02); 403.1023 (1.4%,-388.08); 415.2530 (1.3%,-375.93); 419.6963 (1.8%,-371.48); 432.2804 (4.5%,-358.90); 571.1084 (4.8%,-220.07); 640.2168 (1.4%,-150.96)
139	Unidentified-49	11.47	759.157	M-H	761.17	M+H	C38H32O17	0	18.2	23	+		4	Unidentified	125.0226 (7.3%, -634.13); 169.0133 (13.5%, -590.14); 177.0192 (32.5%, -582.14); 285.0774 (40.7%, -474.08); 303.0873 (84.1%, -456.07); 395.1136 (7.1%, -364.04); 403.0823 (69.5%, -356.07); 421.0928 (100.0%, -338.06); 439.1033 (7.4%, -320.05); 455.0995 (8.0%, -304.06)	252.0863 (3.8%,-509.08); 309.1908 (3.6%,-451.98); 441.2323 (4.3%,-319.94); 640.2163 (7.3%,-120.95); 731.1598 (11.5%,-30.01)
140	hydroxyblumenol-C-Hex-1?	11.62	433.207	M+CH2O2-H	406.243	M+NH4	C19H32O8	1.2	4.5	4		3.3 ± 0.1	3	Megastigmane glycoside	225.1494 (100.0%, -208.06); 387.2018 (22.7%, -46.01)	191.1426 (78.9%,-215.10); 209.1532 (63.0%,-197.09); 225.1477 (5.2%,-181.10); 249.0599 (3.8%,-157.18); 317.1375 (6.3%,-89.11); 331.1745 (4.2%,-75.07); 352.1596 (18.9%,-54.08); 371.2059 (23.0%,-35.04)
141	catechin-catechin-gallate?	11.62	729.146	M-H	731.16	M+H	C37H30O16	-0.1	7.9	23	9.3 ± 1.6		3	Dimeric proanthocyanidin	125.0230 (6.0%, -604.12); 245.0455 (5.4%, -484.10); 271.0610 (17.3%, -458.09); 287.0561 (5.7%, -442.09); 290.0752 (16.4%, -439.07); 339.0880 (6.8%, -390.06); 381.0978 (5.8%, -348.05); 389.0665 (7.4%, -340.08); 407.0774 (90.0%, -322.07); 451.1039 (7.0%, -278.04)	231.0500 (1.0%,-500.11); 249.0610 (1.1%,-482.10); 339.1076 (1.0%,-392.05); 352.1605 (3.2%,-379.00); 374.1448 (3.9%,-357.02); 520.2006 (1.4%,-210.96); 594.1197 (1.8%,-137.04); 669.2501 (1.0%,-61.91)
142	sinapoyl-O-Hex?	11.78	385.114	M-H			C17H22O10	1.1	23.2	7		+	3	Benzoic acid derivative	231.0496 (5.0%, -154.06); 249.0614 (52.5%, -136.05); 267.0718 (100.0%, -118.04)
143	Unidentified-50	11.79	897.152	M-H	899.165	M+H	C44H34O21	0.3	9.7	28	4.1 ± 0.6		4	Unidentified	245.0461 (18.7%, -652.11); 269.0455 (77.1%, -628.11); 287.0565 (63.3%, -610.10); 305.0670 (37.7%, -592.08); 379.0817 (13.2%, -518.07); 395.0774 (25.9%, -502.07); 423.0723 (100.0%, -474.08); 449.0885 (26.7%, -448.06); 575.1198 (13.4%, -322.03)	181.1221 (41.3%,-718.04); 369.1178 (22.7%,-530.05); 404.1551 (15.0%,-495.01); 441.0818 (12.1%,-458.08); 519.2735 (13.9%,-379.89); 773.2119 (34.9%,-125.95)
144	quercetin-3-Hex-7-HexA?	11.92	639.12	M-H	641.134	M+H	C27H28O18	0.6	10.2	14		0.8 ± 0.3	3	Flavonol glycoside	315.0224 (63.6%, -324.10); 463.0882 (100.0%, -176.03)	249.0603 (9.3%,-392.07); 343.1021 (4.7%,-298.03); 350.2171 (6.2%,-290.92); 357.1538 (7.8%,-283.98); 375.1643 (10.3%,-265.97); 393.1748 (13.5%,-247.96); 410.2012 (13.6%,-230.93); 469.1329 (9.0%,-172.00); 625.1749 (14.4%,-15.96)
145	rhodioloside-A?	11.96	347.171	M-H			C16H28O8	0.9	19.4	3		+	3	Acyclic alcohol glycoside	156.9429 (7.7%, -190.23); 161.0415 (15.6%, -186.13); 183.1069 (8.1%, -164.06); 203.1335 (14.3%, -144.04); 227.1036 (6.2%, -120.07); 258.1152 (6.4%, -89.06); 277.7940 (6.4%, -69.38); 300.8233 (6.6%, -46.35); 305.1316 (6.6%, -42.04)
146	coumaroyl-galloyl-Hex?	12.01	477.104	M-H			C22H22O12	-0.2	7.9	12	+		3	Phenylpropanoid derivative	163.0393 (5.2%, -314.06); 169.0133 (11.2%, -308.09); 313.0568 (100.0%, -164.05)
147	Unidentified-51	12.06	733.183	M-H			C30H38O21	1.1	9.3	12		+	4	Unidentified	165.0178 (100.0%, -568.16); 197.0453 (10.2%, -536.14); 207.0293 (5.2%, -526.15); 319.0813 (5.0%, -414.10); 327.0707 (53.7%, -406.11); 341.0864 (9.8%, -392.10); 345.0626 (75.9%, -388.12); 353.0510 (17.5%, -380.13); 359.0987 (6.5%, -374.08); 507.1141 (46.8%, -226.07)
148	Unidentified-52	12.13	369.177	M+CH2O2-H	342.212	M+NH4	C14H28O8	-0.3	3.1	1	+		4	Unidentified	119.0271 (19.3%, -250.15); 159.0300 (14.9%, -210.15); 164.0478 (19.3%, -205.13); 170.0123 (27.3%, -199.16); 194.0540 (15.5%, -175.12); 223.0473 (19.9%, -146.13); 303.9789 (29.2%, -65.20); 323.1696 (100.0%, -46.01)	163.1329 (100.0%,-179.08); 175.1482 (9.5%,-167.06); 191.1432 (16.6%,-151.07); 227.1637 (9.5%,-115.05); 320.2332 (5.6%,-21.98); 325.1861 (42.0%,-17.03)
149	dihydro-ionol-Hex?	12.15	431.228	M+CH2O2-H			C20H34O7	1.3	22.8	4		5.1 ± 4.1	3	Megastigmane glycoside	161.0441 (10.2%, -270.18); 227.1648 (100.0%, -204.06); 387.2021 (16.9%, -44.03); 390.2217 (5.8%, -41.01)
150	Unidentified-53	12.27	427.197	M+CH2O2-H			C20H30O7	0	43.7	6	+		4	Unidentified	152.0826 (43.0%, -275.11); 161.0443 (34.6%, -266.15); 189.1291 (68.5%, -238.07); 205.1229 (100.0%, -222.07); 223.1347 (23.0%, -204.06); 229.1231 (8.5%, -198.07); 367.1737 (16.1%, -60.02); 385.1874 (29.3%, -42.01)
151	Unidentified-54	12.27	471.188	M+CH2O2-H			C21H30O9	-1.3	34.2	7	+		4	Unidentified	113.0232 (8.5%, -358.16); 138.0671 (6.5%, -333.12); 152.0835 (33.3%, -319.10); 161.0437 (14.9%, -310.14); 189.1280 (16.2%, -282.06); 205.1234 (94.3%, -266.06); 223.1349 (39.6%, -248.05); 367.1765 (62.9%, -104.01); 385.1862 (57.2%, -86.00); 427.1998 (12.8%, -43.99)
152	gossypetin-Hex?/gossypin	12.27	479.083	M-H	481.097	M+H	C21H20O13	0	10.2	12		+	3	Flavonol glycoside	315.0226 (100.0%, -162.06)	191.1426 (40.2%,-289.95); 279.1696 (7.9%,-201.93); 319.0447 (22.5%,-162.05); 375.1638 (3.1%,-105.93); 383.2060 (2.5%,-97.89); 393.1751 (3.7%,-87.92); 410.2013 (3.0%,-70.90); 439.0686 (11.4%,-42.03)
153	dihydroxymegastigmen-one-Hex-dHex?	12.27	579.266	M+CH2O2-H	552.301	M+NH4	C25H42O12	0.1	17	5		+	3	Megastigmane glycoside	153.0902 (5.3%, -426.18); 163.0601 (7.9%, -416.21); 205.0721 (17.3%, -374.19); 225.1492 (100.0%, -354.12); 247.0823 (22.3%, -332.18); 307.1043 (8.5%, -272.16); 316.0220 (9.8%, -263.24); 387.2020 (22.5%, -192.06); 533.2602 (70.9%, -46.01)	191.1426 (71.3%,-361.16); 279.1695 (7.2%,-273.13); 309.1177 (6.4%,-243.18); 319.0446 (9.7%,-233.26); 393.1753 (8.1%,-159.13); 439.0690 (18.6%,-113.23); 473.2011 (25.8%,-79.10); 481.0969 (100.0%,-71.20); 517.2638 (29.6%,-35.04); 535.2742 (32.3%,-17.03)
154	Unidentified-55	12.34	427.198	M-H			C21H32O9	-1	89	6	1.7 ± 0.2		4	Unidentified	152.0826 (43.0%, -275.11); 161.0443 (34.6%, -266.15); 189.1291 (68.5%, -238.07); 205.1229 (100.0%, -222.07); 223.1347 (23.0%, -204.06); 229.1231 (8.5%, -198.07); 367.1737 (16.1%, -60.02); 385.1874 (29.3%, -42.01)
155	eugenol-Hex-dHex?	12.34	471.188	M-H	473.202	M+H	C22H32O11	-1.1	18	7	+	+	3	Phenol derivative	113.0232 (8.5%, -358.16); 138.0671 (6.5%, -333.12); 152.0835 (33.3%, -319.10); 161.0437 (14.9%, -310.14); 189.1280 (16.2%, -282.06); 205.1234 (94.3%, -266.06); 223.1349 (39.6%, -248.05); 367.1765 (62.9%, -104.01); 385.1862 (57.2%, -86.00); 427.1998 (12.8%, -43.99)	207.1382 (13.7%,-266.06); 210.1568 (2.3%,-263.05); 227.1643 (1.6%,-246.04); 249.0606 (2.6%,-224.14); 339.0715 (1.2%,-134.13); 389.2171 (1.9%,-83.98); 418.1710 (1.1%,-55.03); 435.1292 (3.3%,-38.07); 455.1919 (8.8%,-18.01)
156	galloyl-syringoyl-O-Hex?	12.35	511.109	M-H			C22H24O14	0.3	13.6	11		+	3	Gallic acid derivative	151.0021 (45.6%, -360.11); 169.0130 (53.0%, -342.10); 175.0030 (25.7%, -336.11); 183.0293 (27.5%, -328.08); 193.0145 (23.3%, -318.09); 313.0571 (29.3%, -198.05); 327.0719 (100.0%, -184.04); 341.0875 (44.0%, -170.02); 452.0966 (24.8%, -59.01); 467.1189 (68.2%, -43.99)
157	Unidentified-56	12.39	773.173	M-H	775.187	M+H	C39H34O17	-0.6	9.4	23	3.6 ± 0.4		4	Unidentified	125.0238 (7.6%, -648.15); 169.0138 (12.8%, -604.16); 315.0871 (48.7%, -458.08); 333.0983 (100.0%, -440.07); 433.0925 (48.0%, -340.08); 451.1041 (74.2%, -322.07); 477.1188 (11.1%, -296.05)	191.1069 (6.3%,-584.08); 207.1381 (4.5%,-568.05); 219.1016 (7.2%,-556.09); 237.1122 (18.7%,-538.07); 416.1919 (22.7%,-358.99); 473.2022 (31.7%,-301.98); 492.2443 (10.2%,-282.94); 519.1978 (6.2%,-255.99); 537.2081 (16.7%,-237.98); 661.1401 (4.5%,-114.05)
158	Unidentified-57	12.42	397.15	M-H	416.192	M+NH4	C19H26O9	-0.1	3.7	7	2.9 ± 0.2		4	Unidentified	190.1000 (100.0%, -207.05); 233.1185 (13.0%, -164.03); 245.1189 (11.1%, -152.03)	191.1069 (27.4%,-225.08); 219.1017 (27.6%,-197.09); 237.1122 (83.3%,-179.08); 289.1646 (5.6%,-127.03); 305.1754 (3.7%,-111.02); 371.2067 (9.4%,-44.99); 375.1558 (8.4%,-41.04); 399.1649 (2.7%,-17.03)
159	Unidentified-58	12.48	611.256	M-H	630.296	M+NH4	C26H44O16	-0.1	9.3	5	+	+	4	Unidentified	207.1391 (16.3%, -404.12); 251.1289 (100.0%, -360.13); 431.1927 (30.8%, -180.06)	211.1690 (5.8%,-419.13); 235.1324 (8.7%,-395.16); 253.1429 (26.2%,-377.15); 271.1534 (10.5%,-359.14); 289.1643 (95.6%,-341.13); 373.2216 (7.9%,-257.07); 391.2323 (5.7%,-239.06); 438.0850 (7.6%,-192.21); 451.2169 (73.1%,-179.08); 613.2692 (100.0%,-17.03)
160	phenylpropyl-Hex?/triandrin?	12.57	311.114	M-H			C15H20O7	0	17.1	6	+	1.6 ± 0.0	3	Phenylpropanoid derivative	159.0282 (11.5%, -152.09); 269.1031 (100.0%, -42.01)
161	gossypetin-Pent?	12.59	449.072	M-H	451.087	M+H	C20H18O12	0.4	24.5	12		+	3	Flavonol glycoside	315.0222 (100.0%, -132.05)	127.0397 (3.6%,-324.05); 231.0497 (13.5%,-220.04); 303.0861 (5.9%,-148.00); 319.0448 (8.5%,-132.04); 322.1004 (2.8%,-128.99); 339.1072 (36.8%,-111.98); 359.2427 (5.4%,-91.84); 374.1442 (100.0%,-76.94); 377.2529 (11.7%,-73.83); 427.2168 (4.9%,-23.87)
162	Unidentified-59	12.65	743.162	M-H	745.176	M+H	C38H32O16	0.2	3	23	10.1 ± 0.9		4	Unidentified	125.0229 (8.2%, -618.14); 169.0138 (11.4%, -574.15); 285.0767 (38.2%, -458.08); 303.0875 (100.0%, -440.07); 403.0822 (44.6%, -340.08); 421.0927 (75.8%, -322.07); 439.1033 (7.7%, -304.06); 447.1083 (10.8%, -296.05); 455.0979 (8.0%, -288.06); 465.1189 (7.6%, -278.04)	219.1014 (31.9%,-526.07); 249.1122 (53.8%,-496.06); 295.1754 (100.0%,-450.00); 312.2018 (37.2%,-432.97); 404.1707 (25.4%,-341.01); 435.1288 (60.4%,-310.05); 441.0818 (36.2%,-304.09); 444.2441 (41.6%,-300.93); 475.2179 (26.2%,-269.96); 609.2172 (50.6%,-135.96)
163	Unidentified-60	12.7	911.167	M-H	913.181	M+H	C45H36O21	0.7	13.2	28	2.2 ± 0.2		4	Unidentified	125.0229 (13.7%, -786.14); 169.0132 (13.4%, -742.15); 269.0454 (62.1%, -642.12); 287.0556 (20.3%, -624.11); 301.0717 (33.0%, -610.10); 319.0825 (74.3%, -592.08); 437.0882 (100.0%, -474.08); 463.1030 (30.5%, -448.06); 481.1128 (13.5%, -430.05); 589.1381 (18.3%, -322.03)	249.1121 (4.5%,-664.07); 309.1914 (2.3%,-603.99); 324.1447 (4.7%,-589.04); 404.1707 (1.6%,-509.01); 435.1290 (2.0%,-478.05); 441.0817 (2.8%,-472.10); 475.2176 (4.3%,-437.96); 670.1242 (2.7%,-243.06); 745.1758 (100.0%,-168.01); 748.1850 (2.4%,-165.00)
164	Unidentified-61	12.79	303.088	M-H	305.102	M+H	C16H16O6	-1.4	23.8	9	+		4	Unidentified	137.0227 (34.7%, -166.06); 202.0645 (11.3%, -101.02); 217.0871 (24.1%, -86.00); 226.0635 (16.5%, -77.02); 235.0968 (43.6%, -67.99); 241.0524 (10.5%, -62.03); 244.0748 (39.4%, -59.01); 259.0979 (29.4%, -43.99); 270.0532 (43.1%, -33.03); 285.0772 (100.0%, -18.01)
165	Unidentified-62	12.8	337.057	M-H			C15H14O9	-0.4	24.9	9	+		4	Unidentified	91.9143 (12.5%, -245.14); 147.0287 (9.7%, -190.03); 163.0408 (12.0%, -174.02); 173.0078 (5.5%, -164.05); 191.0202 (100.0%, -146.04); 231.0658 (9.4%, -105.99); 260.0485 (5.1%, -77.01)
166	methylepigallocatechin?	12.92	333.098	M-H	335.113	M+H	C17H18O7	0.4	5.3	9	6.0 ± 0.3		3	Flavanol	137.0224 (39.8%, -196.08); 195.0660 (27.7%, -138.03); 249.0767 (26.7%, -84.02); 259.0613 (21.0%, -74.04); 265.1077 (46.7%, -67.99); 274.0845 (40.8%, -59.01); 285.0407 (39.6%, -48.06); 289.1086 (25.3%, -43.99); 300.0644 (36.4%, -33.03); 315.0873 (100.0%, -18.01)	167.0706 (10.1%,-168.04); 197.0808 (1.2%,-138.03); 239.0914 (2.8%,-96.02); 303.0504 (2.5%,-32.06); 317.1026 (3.1%,-18.01)
167	quercetin-3-Hex-dHex-7-dHex?	12.92	755.203	M-H	757.218	M+H	C33H40O20	0.9	2	14	4.7 ± 0.7		3	Flavonol glycoside	299.0198 (39.7%, -456.18); 447.0852 (100.0%, -308.12); 609.1460 (29.7%, -146.06)	167.0703 (8.5%,-590.15); 197.0808 (1.2%,-560.14); 317.1022 (2.4%,-440.12); 335.1126 (75.1%,-422.11); 449.1078 (14.0%,-308.11); 586.1218 (1.4%,-171.10); 595.1660 (2.8%,-162.05); 669.2181 (2.8%,-88.00); 686.2442 (1.9%,-70.97)
168	epigallocatechin-methylgallate?	13	471.093	M-H	473.108	M+H	C23H20O11	0.3	7.4	14	+		3	Flavanol	125.0241 (9.2%, -346.07); 169.0135 (52.4%, -302.08); 235.0610 (5.5%, -236.03); 260.0691 (14.7%, -211.02); 269.0457 (11.4%, -202.05); 275.0924 (14.6%, -196.00); 319.0827 (100.0%, -152.01); 333.0624 (5.0%, -138.03)	153.0544 (19.2%,-320.05); 163.0602 (10.1%,-310.05); 303.0865 (100.0%,-170.02); 323.1604 (34.7%,-149.95); 354.2122 (13.7%,-118.90); 371.2068 (15.5%,-101.90); 406.2439 (10.3%,-66.86); 435.1287 (28.9%,-37.98); 445.1711 (11.3%,-27.94)
169	digalloylprocyanidin-B2?	13.08	881.157	M-H	883.17	M+H	C44H34O20	0.4	5.9	28	5.0 ± 0.4		3	Dimeric proanthocyanidin	269.0456 (41.0%, -612.11); 287.0563 (18.1%, -594.10); 290.0756 (12.2%, -591.08); 407.0772 (100.0%, -474.08); 419.0771 (10.7%, -462.08); 433.0934 (24.1%, -448.06); 451.1039 (14.1%, -430.05); 559.1247 (15.3%, -322.03)	291.0974 (5.7%,-592.07); 371.2066 (1.9%,-511.96); 441.0815 (15.3%,-442.09); 474.1113 (6.1%,-409.06); 520.3324 (4.1%,-362.84); 535.2019 (3.1%,-347.97); 595.1658 (2.9%,-288.00); 667.2584 (2.1%,-215.91)
170	iondiolone-Hex-2?	13.15	433.208	M+CH2O2-H	406.243	M+NH4	C19H32O8	0.5	8.9	4	1.3 ± 0.5	+	3	Megastigmane glycoside	161.0444 (5.6%, -272.16); 205.1235 (21.1%, -228.08); 225.1493 (29.9%, -208.06); 253.1477 (5.2%, -180.06); 387.2027 (100.0%, -46.01)	191.1428 (5.1%,-215.10); 209.1533 (6.9%,-197.09); 227.1638 (100.0%,-179.08); 231.1586 (9.7%,-175.08); 331.1387 (4.7%,-75.10); 339.0712 (4.6%,-67.17); 356.0978 (5.6%,-50.15); 389.2169 (32.6%,-17.03)
171	quercetin_3-7-dHex	13.32	593.151	M-H	595.166	M+H	C27H30O15	0.6	7.7	13	+		2	Flavonol glycoside	249.1131 (14.1%, -344.04); 299.0203 (60.7%, -294.13); 302.0384 (8.4%, -291.11); 447.0849 (100.0%, -146.07)	233.1175 (15.0%,-362.05); 251.1279 (34.2%,-344.04); 269.1387 (15.7%,-326.03); 371.2071 (8.3%,-223.96); 427.2080 (29.7%,-167.96); 431.1915 (9.4%,-163.97); 492.2444 (8.3%,-102.92); 514.2286 (8.9%,-80.94)
172	quercetin-3-Pent-dHex-7-dHex-1?	13.33	725.193	M-H	727.208	M+H	C32H38O19	0.2	9.4	14	+		3	Flavonol glycoside	299.0202 (37.6%, -426.17); 447.0857 (100.0%, -278.11); 579.1354 (24.3%, -146.06)	186.9564 (30.2%,-540.25); 406.2363 (15.4%,-320.97); 419.1708 (18.1%,-308.04); 441.0825 (30.5%,-286.13); 444.1012 (21.4%,-283.11); 449.1084 (39.8%,-278.10); 531.2441 (100.0%,-195.96); 596.1698 (17.1%,-131.04)
173	catechin-gallate-1?	13.36	441.082	M-H	443.098	M+H	C22H18O10	0.8	24.9	14	+		2	Flavanol	125.0225 (7.0%, -316.06); 169.0138 (47.8%, -272.07); 179.0344 (6.5%, -262.05); 203.0708 (5.5%, -238.01); 245.0816 (29.0%, -196.00); 271.0600 (7.9%, -170.02); 289.0721 (100.0%, -152.01)	273.0762 (17.8%,-170.02); 406.2357 (48.8%,-36.86)
175	kaempferol-Pent-HexA?	13.37	593.115	M-H	595.129	M+H	C26H26O16	0	23.6	14		+	3	Flavonol glycoside	285.0406 (100.0%, -308.07); 327.0505 (6.2%, -266.06)	233.1169 (6.1%,-362.01); 251.1276 (11.7%,-344.00); 269.1381 (2.8%,-325.99); 340.2330 (1.8%,-254.90); 427.2070 (2.6%,-167.92); 431.1908 (3.1%,-163.94); 451.0873 (2.8%,-144.04); 461.1261 (2.1%,-134.00); 479.0819 (15.8%,-116.05); 575.2332 (1.7%,-19.90)
176	quercetin-3-Pent-dHex-7-dHex-2?	13.39	725.194	M-H	727.207	M+H	C32H38O19	-0.5	14.7	14	0.9 ± 0.1		3	Flavonol glycoside	299.0202 (37.6%, -426.17); 447.0857 (100.0%, -278.11); 579.1354 (24.3%, -146.06)	207.1378 (12.4%,-520.07); 389.2167 (7.6%,-337.99); 428.1693 (12.0%,-299.04); 443.0972 (8.4%,-284.11); 449.1077 (13.0%,-278.10); 457.0764 (7.9%,-270.13); 478.1634 (7.7%,-249.04); 513.2331 (8.3%,-213.97); 531.2435 (100.0%,-195.96); 677.1329 (8.7%,-50.07)
177	gossypetin-dHex?	13.45	463.089	M-H	465.103	M+H	C21H20O12	-0.6	11.7	12		5.4 ± 1.7	2	Flavonol glycoside	315.0226 (100.0%, -146.07)	186.9562 (2.2%,-278.15); 191.1430 (5.6%,-273.96); 207.1018 (1.1%,-258.00); 227.1638 (8.9%,-237.94); 309.1904 (1.4%,-155.91); 319.0450 (100.0%,-146.06); 406.2433 (11.8%,-58.86); 422.2024 (1.5%,-42.90); 439.1959 (1.5%,-25.91)
178	C12:4-Hex?	13.49	403.161	M-H			C18H28O10	-0.2	23.1	5	+		3	Fatty acid glycoside	179.1068 (32.6%, -224.05); 223.0977 (100.0%, -180.06)
179	catechin-gallate-2?	13.49	441.083	M-H	443.097	M+H	C22H18O10	-0.9	28.7	14	1.4 ± 0.6		2	Flavanol	125.0225 (7.0%, -316.06); 169.0138 (47.8%, -272.07); 179.0344 (6.5%, -262.05); 203.0708 (5.5%, -238.01); 245.0816 (29.0%, -196.00); 271.0600 (7.9%, -170.02); 289.0721 (100.0%, -152.01)	175.1483 (9.4%,-267.95); 209.1534 (8.2%,-233.94); 219.1741 (8.2%,-223.92); 273.0752 (9.2%,-170.02); 287.0549 (6.1%,-156.04); 406.2365 (14.1%,-36.86); 419.1697 (6.1%,-23.93)
180	gossypetin-Pent-dHex?	13.55	595.13	M-H	597.145	M+H	C26H28O16	0	1.7	13		12.3 ± 1.9	3	Flavonol glycoside	315.0225 (100.0%, -278.11)	231.0498 (12.9%,-366.09); 267.1254 (3.2%,-330.02); 301.0342 (2.9%,-296.11); 319.0449 (15.5%,-278.10); 354.1758 (19.8%,-242.97); 451.1713 (2.9%,-145.97); 469.1816 (58.0%,-127.96); 479.0819 (100.0%,-118.06); 486.2085 (13.9%,-110.94); 493.2065 (4.4%,-103.94)
181	quercetin-HexA-1?	13.73	477.068	M-H	479.082	M+H	C21H18O13	-0.3	4.3	13		3.2 ± 0.4	3	Flavonol glycoside	301.0355 (100.0%, -176.03)	189.1273 (4.7%,-289.95); 207.1376 (4.3%,-271.94); 225.1482 (8.9%,-253.93); 231.0499 (15.2%,-248.03); 301.0342 (4.3%,-178.05); 319.0450 (16.7%,-160.04); 354.1757 (18.7%,-124.91); 386.2383 (4.6%,-92.84); 451.1712 (4.8%,-27.91)
182	Unidentified-64	13.79	315.055	M-H			C13H16O7S	-0.8	12.9	6	1.5 ± 0.4		4	Unidentified	191.1078 (100.0%, -123.95); 235.0976 (42.8%, -79.96)
183	Unidentified-65	13.84	397.15	M-H	416.191	M+NH4	C19H26O9	0.3	5.6	7		+	4	Unidentified	190.0999 (100.0%, -207.05); 233.1184 (7.0%, -164.03); 284.0892 (8.6%, -113.06); 353.1606 (6.7%, -43.99)	191.1065 (100.0%,-225.08); 209.1537 (23.2%,-207.04); 219.1016 (77.4%,-197.09); 237.1118 (53.7%,-179.08); 290.1677 (20.2%,-126.02); 303.0500 (90.9%,-113.14); 363.1434 (11.8%,-53.05); 389.2173 (10.9%,-26.97)
184	quercetin-Hex?	13.84	463.088	M-H	465.102	M+H	C21H20O12	-0.4	26.3	12		+	2	Flavonol glycoside	285.0408 (6.2%, -178.05); 301.0277 (100.0%, -162.06)	191.1065 (21.3%,-274.00); 209.1536 (3.3%,-255.95); 219.1014 (19.3%,-246.00); 237.1120 (10.5%,-227.99); 303.0499 (19.6%,-162.05); 371.2065 (2.9%,-93.90); 406.2433 (3.9%,-58.86); 414.2336 (3.1%,-50.87); 445.2429 (7.3%,-19.86)
185	kaempferol-3-Hex-dHex-7-dHex?	13.87	739.209	M-H	741.222	M+H	C33H40O19	-0.2	19.8	14	1.8 ± 0.1		3	Flavonol glycoside	283.0252 (29.7%, -456.18); 413.0880 (6.3%, -326.12); 431.0910 (49.9%, -308.12); 593.1514 (100.0%, -146.06)	209.1532 (12.8%,-532.07); 323.2063 (3.5%,-418.02); 406.2431 (11.9%,-334.98); 433.1123 (18.8%,-308.11); 441.0809 (3.6%,-300.14); 465.1022 (3.3%,-276.12); 475.2168 (9.0%,-266.01); 507.2793 (9.8%,-233.94); 524.3061 (2.8%,-216.92); 579.1696 (3.5%,-162.05)
186	Unidentified-66	13.96	449.203	M-H	468.244	M+NH4	C20H34O11	-0.7	3.8	4	2.2 ± 0.3	9.8 ± 0.0	4	Unidentified	207.1396 (6.3%, -242.06); 225.1497 (10.8%, -224.05); 251.1289 (7.8%, -198.07); 269.1397 (100.0%, -180.06)	207.1374 (1.5%,-261.11); 211.1326 (2.0%,-257.11); 217.1218 (3.3%,-251.12); 235.1324 (13.6%,-233.11); 253.1429 (52.4%,-215.10); 271.1535 (20.8%,-197.09); 289.1642 (100.0%,-179.08); 357.1437 (1.7%,-111.10); 447.1282 (7.8%,-21.12); 451.2172 (13.9%,-17.03)
187	Unidentified-67	14.3	895.173	M-H	897.186	M+H	C45H36O20	0.1	12.7	28	+		4	Unidentified	169.0138 (26.5%, -726.16); 269.0459 (63.9%, -626.13); 285.0771 (40.9%, -610.10); 303.0879 (100.0%, -592.08); 403.0821 (56.8%, -492.09); 421.0933 (98.1%, -474.08); 447.1089 (41.1%, -448.06); 465.1190 (19.7%, -430.05); 573.1416 (21.8%, -322.03)	231.0500 (1.1%,-666.14); 337.6696 (1.1%,-559.52); 388.1605 (1.3%,-509.03); 394.6912 (1.7%,-502.49); 441.0817 (1.2%,-456.10); 503.2866 (100.0%,-393.90); 506.2950 (1.1%,-390.89)
188	Unidentified-68	14.39	429.213	M-H			C21H34O9	0.1	22.7	5		+	4	Unidentified	159.0283 (15.4%, -270.18); 175.0363 (20.0%, -254.18); 189.1028 (13.1%, -240.11); 204.1080 (19.4%, -225.10); 222.8144 (14.9%, -206.40); 227.1546 (18.3%, -202.06); 247.1313 (20.6%, -182.08); 343.1638 (16.6%, -86.05); 368.1957 (22.3%, -61.02); 387.2045 (100.0%, -42.01)
189	methoxy-kaempferol-HexA?	14.39	491.083	M-H	493.098	M+H	C22H20O13	-0.1	18.2	13		+	3	Flavonol glycoside	300.0275 (100.0%, -191.06); 315.0506 (93.1%, -176.03)	191.1431 (8.7%,-301.95); 267.1229 (19.3%,-225.97); 303.0503 (14.9%,-190.05); 347.1242 (8.3%,-145.97); 393.2487 (10.1%,-99.85); 435.0920 (13.4%,-58.01); 446.2021 (9.8%,-46.90); 457.2069 (100.0%,-35.89); 479.1186 (72.7%,-13.98)
190	Unidentified-69	14.49	405.177	M-H			C18H30O10	-1.1	23.5	4	+	+	4	Unidentified	181.1223 (30.3%, -224.05); 225.1129 (100.0%, -180.06)
191	Unidentified-70	14.56	315.055	M-H			C13H16O7S	-0.6	10.2	6	+		4	Unidentified	191.1078 (96.1%, -123.95); 235.0977 (100.0%, -79.96)
192	ligurobustoside-M?	14.95	591.229	M-H			C26H40O15	0	31.2	7		+	3	Phenylpropanoid derivative	161.1321 (6.0%, -430.10); 187.1133 (15.2%, -404.12); 205.1230 (48.8%, -386.11); 229.1231 (10.2%, -362.11); 249.1134 (100.0%, -342.12); 291.1233 (8.7%, -300.11); 429.1770 (11.6%, -162.05)
193	quercetin-3-Hex-dHex-1?	15.01	609.146	M-H	611.16	M+H	C27H30O16	0.8	23.5	13		+	3	Flavonol glycoside	315.0145 (42.6%, -294.13); 331.0380 (100.0%, -278.11)	233.1170 (2.4%,-378.04); 251.1274 (4.6%,-360.03); 305.0556 (4.5%,-306.10); 333.0606 (16.5%,-278.10); 490.3005 (2.2%,-120.86); 493.3200 (5.1%,-117.84); 517.2646 (1.5%,-93.90); 533.1767 (3.9%,-77.98)
194	quercetin-3-dHex-Pent?	15.11	579.135	M-H	581.15	M+H	C26H28O15	0.6	0.6	13	+	79.2 ± 4.3	3	Flavonol glycoside	301.0274 (100.0%, -278.11)	279.1073 (1.4%,-302.04); 303.0501 (78.9%,-278.10); 327.0899 (1.2%,-254.06); 367.1211 (1.7%,-214.03); 385.1316 (6.4%,-196.02); 402.1584 (3.1%,-178.99); 449.1077 (88.6%,-132.04); 465.0892 (1.2%,-116.06); 482.1150 (2.4%,-99.03)
195	myrcetin-methyl_ether-dHex?	15.2	477.104	M-H	479.118	M+H	C22H22O12	-0.1	27.1	12		+	3	Flavonol glycoside	287.0191 (5.9%, -190.08); 315.0151 (67.8%, -162.09); 331.0381 (100.0%, -146.07)	175.0604 (6.3%,-304.06); 333.0608 (100.0%,-146.06); 401.2757 (7.5%,-77.84); 408.2593 (8.5%,-70.86); 427.1610 (11.9%,-51.96); 434.1523 (6.1%,-44.97); 445.7376 (10.1%,-33.38); 461.1439 (8.1%,-17.97)
196	kaempferol-3-HexA-dHex?	15.2	607.13	M-H	609.145	M+H	C27H28O16	0	19.6	14		+	3	Flavonol glycoside	284.0327 (18.3%, -323.10); 299.0562 (100.0%, -308.07)	287.0550 (2.3%,-322.09); 333.0607 (9.6%,-276.08); 366.1761 (1.6%,-242.97); 427.1611 (1.7%,-181.98); 445.7377 (1.2%,-163.41); 451.1154 (1.4%,-158.03); 472.3129 (2.9%,-136.83); 479.1183 (20.4%,-130.03); 595.1291 (3.1%,-14.02)
197	epigallocatechin-dimethylgallate?	15.26	485.109	M-H	504.15	M+NH4	C24H22O11	-0.3	4.9	14	9.4 ± 2.3		3	Flavanol	169.0135 (13.6%, -316.10); 276.1730 (13.6%, -208.94); 285.0404 (6.0%, -200.07); 289.1082 (6.2%, -196.00); 300.0641 (12.5%, -185.05); 315.0875 (48.2%, -170.02); 333.0982 (100.0%, -152.01)	167.0700 (1.1%,-337.08); 197.1169 (1.7%,-307.03); 287.1640 (1.2%,-216.99); 305.1745 (11.5%,-198.98); 317.1018 (8.2%,-187.05); 323.1851 (4.6%,-180.96); 361.0914 (2.1%,-143.06); 398.2014 (0.8%,-105.95); 485.2378 (3.6%,-18.91); 489.1288 (5.4%,-15.02)
198	quercetin-dHex?	15.32	447.093	M-H	449.108	M+H	C21H20O11	-0.2	4.7	12		10.1 ± 1.4	2	Flavonol glycoside	301.0278 (100.0%, -146.07)	279.1074 (1.7%,-170.00); 287.1640 (1.3%,-161.94); 303.0501 (87.3%,-146.06); 322.2017 (1.2%,-126.91); 333.0607 (1.2%,-116.05); 367.1212 (2.4%,-81.99); 385.1318 (8.3%,-63.98); 402.1585 (3.9%,-46.95)
199	quercetin-3-Hex-dHex-2?	15.36	609.146	M-H	611.16	M+H	C27H30O16	0.6	7.4	13		+	3	Flavonol glycoside	315.0148 (13.7%, -294.13); 331.0381 (100.0%, -278.11)	295.1026 (2.4%,-316.06); 333.0607 (17.6%,-278.10); 359.2429 (4.1%,-251.92); 385.1318 (5.2%,-226.03); 438.2334 (4.7%,-172.93); 482.1150 (2.6%,-129.05); 493.0979 (8.4%,-118.06); 519.2796 (2.4%,-91.88); 526.2187 (2.2%,-84.94); 536.3068 (2.4%,-74.85)
200	Unidentified-71	15.4	337.039	M-H			C15H14O7S	-1.3	30.7	9	+		4	Unidentified	213.0924 (17.4%, -123.95); 257.0821 (100.0%, -79.96)
201	hydroxymegastigmaneon-Hex?/myrsinionoside-B?	15.43	421.244	M+CH2O2-H	377.253	M+H	C19H36O7	-0.1	4.2	2		+	3	Megastigmane glycoside	191.0548 (19.2%, -230.19); 231.0322 (59.2%, -190.21); 258.1622 (41.2%, -163.08); 285.1503 (31.8%, -136.09); 302.1508 (40.8%, -119.09); 317.1597 (42.5%, -104.08); 335.1717 (100.0%, -86.07); 339.1216 (20.1%, -82.12); 365.1026 (26.3%, -56.14); 375.2375 (76.5%, -46.01)	179.1795 (16.7%,-198.07); 193.0709 (6.3%,-184.18); 197.1900 (36.6%,-180.06); 251.1279 (6.7%,-126.13); 327.0903 (7.5%,-50.16); 359.2432 (100.0%,-18.01)
202	quercetin-HexA-2?	15.55	477.104	M-H	479.118	M+H	C22H22O12	-0.8	28.8	12		+	3	Flavonol glycoside	301.0368 (5.8%, -176.07); 315.0432 (32.9%, -162.06); 331.0384 (100.0%, -146.07)	317.0659 (10.1%,-162.05); 333.0607 (100.0%,-146.06); 347.0762 (8.6%,-132.04); 373.2222 (45.8%,-105.90); 389.1345 (16.9%,-89.98); 449.1076 (14.3%,-30.01)
203	hydroxymegastigmenon-Hex?	15.58	417.213	M+CH2O2-H	373.222	M+H	C19H32O7	-0.8	3.1	4	+	+	3	Megastigmane glycoside	161.0452 (17.7%, -256.17); 209.1527 (5.5%, -208.06); 371.2076 (100.0%, -46.01)	193.1588 (2.0%,-180.06); 211.1692 (23.5%,-162.05); 219.1016 (2.6%,-154.12); 237.1122 (2.2%,-136.11)
204	megastigmadienol-Hex?	15.73	415.234	M+C2H4O2-H			C19H32O6	-0.5	23.8	4		+	3	Megastigmane glycoside	113.0223 (7.5%, -302.21); 143.0309 (5.1%, -272.20); 161.0434 (43.9%, -254.19); 211.1709 (30.9%, -204.06); 253.1765 (5.2%, -162.06); 371.2063 (10.2%, -44.03); 374.2272 (30.6%, -41.01)
205	epicatechin-methylgallate?	15.75	455.099	M-H	457.113	M+H	C23H20O10	-0.5	4.3	14	5.9 ± 2.6		3	Flavanol	169.0136 (12.4%, -286.08); 259.0975 (5.5%, -196.00); 270.0535 (10.7%, -185.05); 285.0770 (41.1%, -170.02); 303.0878 (100.0%, -152.01)	249.0607 (2.1%,-208.05); 287.0914 (7.6%,-170.02); 295.1025 (2.4%,-162.01); 310.1474 (2.6%,-146.97); 406.2439 (2.4%,-50.87); 419.1705 (2.8%,-37.94)
206	Unidentified-72	15.76	597.126	M-H	599.139	M+H	C29H26O14	-1.1	9.4	17	+		4	Unidentified	169.0150 (6.5%, -428.11); 247.0246 (9.9%, -350.10); 300.0641 (5.2%, -297.06); 315.0876 (58.9%, -282.04); 327.0884 (18.6%, -270.04); 333.0981 (100.0%, -264.03); 345.0989 (31.7%, -252.03); 387.2405 (5.1%, -209.89); 427.1039 (20.0%, -170.02); 445.1146 (33.8%, -152.01)	287.0909 (9.5%,-312.05); 310.1467 (2.3%,-288.99); 406.2432 (2.7%,-192.90); 419.1700 (3.3%,-179.97); 457.1125 (100.0%,-142.03); 478.2643 (2.0%,-120.87); 533.2594 (2.0%,-65.88); 542.2124 (2.1%,-56.93)
207	kaempferol-methyl_ether-HexA?	16.07	475.088	M-H	477.103	M+H	C22H20O12	0	9.9	13		2.5 ± 1.5	3	Flavonol glycoside	284.0328 (35.0%, -191.06); 299.0563 (100.0%, -176.03)	233.1172 (61.6%,-243.99); 383.1162 (27.9%,-93.99); 459.2227 (79.4%,-17.88); 463.1239 (100.0%,-13.98)
208	phenylpropanol-Hex-Hex?	16.16	429.177	M-H			C20H30O10	-0.5	20.3	6	+	+	3	Phenylpropanoid derivative	158.0777 (7.4%, -271.10); 161.1334 (34.8%, -268.04); 205.1239 (34.6%, -224.05); 223.1350 (7.7%, -206.04); 249.1125 (100.0%, -180.06); 254.0815 (6.9%, -175.10); 282.0842 (5.5%, -147.09); 326.1149 (10.0%, -103.06); 342.2237 (6.3%, -86.95)
209	Unidentified-73	16.19	371.135	M-H			C17H24O9	-0.3	22.9	6	+		4	Unidentified	209.0820 (100.0%, -162.05); 251.0915 (9.2%, -120.04)
210	Unidentified-74	16.28	551.214	M+CH2O2-H	524.249	M+NH4	C26H34O10	-1	35.7	10		+	4	Unidentified	355.1557 (17.7%, -196.06); 373.1658 (100.0%, -178.05); 505.2083 (43.4%, -46.01)	191.1429 (24.1%,-333.11); 211.1692 (87.1%,-313.08); 233.1172 (100.0%,-291.13); 251.1278 (45.1%,-273.12); 365.1599 (15.9%,-159.09); 371.2067 (52.5%,-153.04); 374.2257 (13.8%,-150.02); 383.1704 (12.8%,-141.08); 392.2642 (15.5%,-131.98); 507.2228 (56.2%,-17.03)
211	kaempferol-3-Pent-7-dHex?	16.44	563.141	M-H	565.155	M+H	C26H28O14	-0.4	12.4	13		11.0 ± 0.8	3	Flavonol glycoside	284.0329 (100.0%, -279.11)	257.1747 (0.7%,-307.98); 261.0968 (1.0%,-304.06); 279.1074 (1.6%,-286.05); 287.0551 (26.8%,-278.10); 412.2233 (0.7%,-152.93); 433.1131 (2.2%,-132.04); 437.2385 (0.8%,-127.92); 454.2649 (0.6%,-110.89); 493.1340 (18.6%,-72.02); 507.1131 (7.1%,-58.04)
212	tricin-HexA?	16.47	505.099	M-H	507.113	M+H	C23H22O13	-0.4	5.2	13		4.6 ± 0.9	3	Flavonol glycoside	314.0433 (100.0%, -191.06); 329.0668 (64.9%, -176.03)	257.1747 (2.8%,-249.94); 331.0816 (3.8%,-176.03); 412.2236 (2.8%,-94.89); 437.2384 (2.4%,-69.87); 451.2899 (5.1%,-55.82); 455.1914 (29.1%,-51.92); 458.2102 (19.4%,-48.90); 461.2374 (3.4%,-45.88); 474.2329 (2.8%,-32.88); 493.1341 (100.0%,-13.98)
213	Unidentified-75	16.55	411.203	M-H			C21H32O8	-0.4	7.6	6	2.5 ± 0.6		4	Unidentified	113.0239 (30.1%, -298.18); 119.0325 (13.5%, -292.17); 125.0217 (14.9%, -286.18); 137.0957 (100.0%, -274.11); 143.0349 (8.4%, -268.17); 161.0272 (9.2%, -250.18); 172.0843 (9.2%, -239.12); 187.1121 (51.3%, -224.09); 207.1345 (9.6%, -204.07); 325.1398 (8.9%, -86.06)
214	kaempferol-3-Pent-dHex?	16.61	563.141	M-H	565.155	M+H	C26H28O14	-0.1	197.6	13	+	+	3	Flavonol glycoside	284.0328 (100.0%, -279.11)	287.0548 (41.4%,-278.10); 347.0759 (2.8%,-218.08); 370.1636 (41.2%,-194.99); 428.2493 (2.2%,-136.91); 433.1134 (3.1%,-132.04); 458.2102 (9.8%,-106.94); 479.1186 (3.0%,-86.04); 523.2586 (2.8%,-41.90)
215	kaempferol-3-Hex-Hex-Ac-dHex-1?	16.71	797.215	M-H	799.227	M+H	C35H42O21	-1	8.9	15	3.0 ± 0.7		3	Flavonol glycoside	299.0200 (53.1%, -498.19); 488.0961 (100.0%, -309.12); 609.1464 (21.2%, -188.07)	303.0503 (0.6%,-496.18); 309.1179 (0.8%,-490.11); 370.1640 (0.7%,-429.06); 491.1178 (17.1%,-308.11); 522.7564 (1.0%,-276.47); 577.2642 (0.7%,-221.96); 637.1757 (3.8%,-162.05); 695.2904 (0.6%,-103.94); 775.1853 (2.2%,-24.04)
216	quercetin-3-dHex-dHex?	16.72	593.151	M-H	595.165	M+H	C27H30O15	-0.4	6.1	13		4.6 ± 1.0	3	Flavonol glycoside	299.0201 (14.0%, -294.13); 315.0434 (100.0%, -278.11)	221.1894 (1.9%,-373.98); 239.2004 (1.3%,-355.96); 279.1073 (0.6%,-316.06); 317.0656 (20.3%,-278.10); 419.2639 (1.1%,-175.90); 433.1125 (1.6%,-162.05); 436.2901 (1.8%,-158.87); 463.1233 (1.5%,-132.04); 481.3366 (1.6%,-113.83); 577.2633 (1.0%,-17.90)
218	Unidentified-76	16.76	399.112	M-H			C14H24O13	5.3	43.7	3		+	4	Unidentified	190.0993 (27.0%, -209.01); 203.1080 (16.0%, -196.00); 216.1178 (5.1%, -182.99); 228.1142 (7.4%, -171.00); 243.1395 (69.9%, -155.97); 250.0875 (5.9%, -149.02); 255.1385 (45.4%, -143.97); 270.0582 (11.7%, -129.05); 273.1504 (97.5%, -125.96); 355.1228 (100.0%, -43.99)
219	kaempferol-dHex?	16.76	431.099	M-H	433.113	M+H	C21H20O10	-0.7	23.7	12		+	3	Flavonol glycoside	255.0302 (7.4%, -176.07); 285.0331 (90.6%, -146.07)	197.1896 (18.1%,-235.92); 221.1897 (19.1%,-211.92); 231.0495 (34.5%,-202.06); 239.2004 (16.9%,-193.91); 249.0603 (39.8%,-184.05); 287.0548 (60.6%,-146.06); 303.1587 (9.5%,-129.95); 383.1161 (16.1%,-50.00); 409.2220 (14.9%,-23.89); 419.2637 (14.4%,-13.85)
220	Unidentified-77	16.84	417.25	M-H			C21H38O8	-0.6	15.4	3		2.0 ± 0.5	4	Unidentified	161.0475 (6.8%, -256.20); 375.2398 (100.0%, -42.01)
221	patuletin-3-Hex-Pent?	16.91	623.162	M-H	625.175	M+H	C28H32O16	-0.3	8	13		+	3	Flavonol glycoside	329.0304 (22.8%, -294.13); 344.0539 (100.0%, -279.11)	186.9561 (5.9%,-438.22); 317.0653 (5.7%,-308.11); 347.0757 (100.0%,-278.10); 493.1335 (22.7%,-132.04); 499.1796 (4.7%,-126.00); 517.1907 (7.5%,-107.98); 534.2175 (6.6%,-90.96); 539.3406 (5.0%,-85.83); 565.1545 (4.8%,-60.02)
222	Unidentified-78	17.04	431.193	M-H			C20H32O10	-1.1	22.9	5	+		4	Unidentified	207.1389 (47.1%, -224.05); 251.1291 (100.0%, -180.06)
223	octenyl-Hex-Pent-1?	17.04	467.214	M+CH2O2-H	440.249	M+NH4	C19H34O10	-0.8	6.9	3	+	10.7 ± 1.0	3	Acyclic alcohol glycoside	161.0446 (6.2%, -306.17); 233.0669 (12.4%, -234.15); 289.1657 (74.7%, -178.05); 421.2080 (100.0%, -46.01)	163.0600 (3.2%,-277.19); 241.0704 (3.8%,-199.18); 259.0809 (16.5%,-181.17); 273.1693 (4.0%,-167.08); 277.0915 (4.6%,-163.16); 295.1022 (60.9%,-145.15); 405.2117 (5.8%,-35.04); 423.2221 (10.0%,-17.03); 427.1444 (4.2%,-13.10)
224	Unidentified-79	17.16	413.218	M-H			C21H34O8	-0.1	3.1	5	3.2 ± 0.2	+	4	Unidentified	161.0445 (10.9%, -252.17); 209.1547 (12.6%, -204.06); 353.1968 (7.1%, -60.02); 371.2078 (100.0%, -42.01)
225	pentyl-propenyl-Hex-Pent?	17.52	467.214	M+CH2O2-H	440.248	M+NH4	C19H34O10	-0.8	6	3		0.9 ± 0.3	3	Acyclic alcohol glycoside	131.0330 (11.5%, -336.18); 149.0443 (18.1%, -318.17); 161.0449 (5.6%, -306.17); 179.0561 (9.1%, -288.16); 191.0564 (47.9%, -276.16); 233.0669 (16.5%, -234.15); 289.1660 (40.6%, -178.05); 421.2090 (100.0%, -46.00)	241.0701 (5.3%,-199.18); 259.0808 (23.0%,-181.17); 273.1687 (5.9%,-167.08); 277.0913 (5.8%,-163.16); 291.1796 (12.9%,-149.07); 295.1020 (100.0%,-145.15); 347.2061 (6.9%,-93.04); 364.2324 (4.9%,-76.02); 423.2218 (23.5%,-17.03)
226	phenylpropanyl-Hex-Pent?	17.62	429.177	M-H			C20H30O10	-1	11.3	6	+		3	Acyclic alcohol glycoside	161.1330 (12.5%, -268.04); 187.1127 (11.7%, -242.06); 205.1235 (100.0%, -224.05); 249.1129 (95.5%, -180.06)
227	Unidentified-80	17.63	781.219	M-H	783.232	M+H	C35H42O20	0.7	25.7	15	+		4	Unidentified	283.0251 (47.8%, -498.19); 286.0432 (7.0%, -495.18); 413.0882 (6.9%, -368.13); 472.1010 (62.8%, -309.12); 593.1516 (100.0%, -188.07)	233.1169 (4.8%,-550.12); 251.1271 (5.6%,-532.11); 269.1380 (6.3%,-514.09); 431.1909 (1.9%,-352.04); 448.2174 (4.4%,-335.01); 475.1228 (22.4%,-308.11); 517.2635 (24.6%,-265.97); 551.2853 (4.8%,-231.95); 621.1800 (5.0%,-162.05); 709.3807 (1.8%,-73.85)
228	pentyl-propenyl-Hex-dHex?	17.71	481.229	M+CH2O2-H	437.237	M+H	C20H36O10	-0.3	5.7	3		2.4 ± 0.3	3	Acyclic alcohol glycoside	161.0444 (8.5%, -320.18); 247.0824 (6.8%, -234.15); 289.1659 (100.0%, -192.06); 435.2238 (49.8%, -46.01)	129.0551 (1.8%,-308.18); 147.0648 (2.1%,-290.17); 239.1632 (1.4%,-198.07); 255.0857 (4.6%,-182.15); 273.0963 (16.5%,-164.14); 291.1071 (3.0%,-146.13); 309.1178 (100.0%,-128.12); 327.1284 (2.8%,-110.11); 385.2215 (1.4%,-52.02); 417.2477 (1.9%,-19.99)
229	trihydroxy-dimethoxyflavone?/tricin?	18.14	329.067	M-H			C17H14O7	-1.9	19	11		+	3	Flavonol	299.0200 (14.7%, -30.05); 314.0436 (100.0%, -15.02)
230	octenyl-Hex-Pent-2?	18.28	421.209	M-H	440.248	M+NH4	C19H34O10	-1.5	3.2	3		+	3	Acyclic alcohol glycoside	113.0284 (22.0%, -308.18); 119.0325 (15.7%, -302.18); 131.0642 (16.9%, -290.14); 149.0443 (15.3%, -272.16); 161.0387 (16.5%, -260.17); 191.0581 (100.0%, -230.15); 289.1652 (27.5%, -132.04); 300.5165 (12.3%, -120.69); 332.1959 (12.3%, -89.01); 352.6183 (20.8%, -68.59)	243.1586 (34.5%,-197.09); 295.1020 (72.4%,-145.15)
231	octyl-Hex-Pent?	18.37	469.229	M+CH2O2-H	442.264	M+NH4	C19H36O10	-0.9	3.6	2	+		3	Acyclic alcohol glycoside	233.0668 (8.9%, -236.16); 291.1817 (100.0%, -178.05); 423.2234 (80.0%, -46.01)	259.0810 (11.3%,-183.18); 293.1953 (32.2%,-149.07); 425.2377 (9.3%,-17.03)
232	octyl-Hex-dHex?	19.03	483.245	M+CH2O2-H			C20H38O10	-1.3	26	2		+	3	Acyclic alcohol glycoside	121.8200 (5.1%, -361.43); 161.0471 (6.2%, -322.20); 247.0818 (6.6%, -236.16); 291.1818 (100.0%, -192.06); 437.2397 (36.4%, -46.01)
233	Unidentified-81	19.16	465.213	M+CH2O2-H			C23H32O7	-0.5	27.1	8		+	4	Unidentified	258.1627 (100.0%, -207.05)
234	Unidentified-82	19.36	353.034	M-H			C15H14O8S	-0.9	12.3	9	+		4	Unidentified	229.0867 (11.2%, -123.95); 255.0663 (27.1%, -97.97); 273.0772 (99.0%, -79.96); 335.0232 (100.0%, -18.01)
235	citronellol-Hex?	19.69	495.245	M+CH2O2-H	468.28	M+NH4	C21H38O10	-0.8	4.8	3	+		3	Monoterpene derivative	131.0332 (5.5%, -364.21); 233.0686 (6.8%, -262.18); 299.1865 (6.1%, -196.06); 317.1967 (75.3%, -178.05); 449.2396 (100.0%, -46.01)	223.0594 (11.8%,-245.22); 241.0705 (12.5%,-227.21); 259.0807 (39.8%,-209.20); 277.0916 (14.3%,-191.19); 295.1022 (100.0%,-173.18); 357.6796 (12.6%,-110.60); 371.2060 (11.1%,-97.07); 429.2880 (10.1%,-38.99)
236	rosiridol-Hex?/rosiridin?	20.5	331.176	M-H			C16H28O7	0.4	4.4	3		1.6 ± 0.1	3	Iridoid glycoside	113.0212 (10.7%, -218.15); 159.0269 (6.5%, -172.15); 289.1655 (100.0%, -42.01)
237	gingerglycolipid-A	29.8	721.364	M+CH2O2-H	694.399	M+NH4	C33H56O14	1.2	15.9	6	+	+	3	Lipid	277.2174 (100.0%, -444.15); 397.1349 (15.6%, -324.23); 415.1458 (8.6%, -306.22)	219.1737 (2.8%,-475.23); 261.2206 (3.3%,-433.18); 335.2573 (4.5%,-359.14); 353.2683 (35.3%,-341.13); 367.1513 (3.6%,-327.25); 497.3104 (13.7%,-197.09); 515.3210 (33.4%,-179.08); 659.3628 (28.8%,-35.04); 677.3731 (73.7%,-17.03)

## Sheet: Cmpds-classes
Name
Unidentified	68
Flavonol glycoside	31
Acyclic alcohol glycoside	16
Benzoic acid derivative	14
Phenylpropanoid derivative	13
Gallic acid derivative	13
Organic acid	12
Megastigmane glycoside	10
Flavanol	7
Dimeric proanthocyanidin	6
Acyclic nitrile glycoside	5
Phenol derivative	2
Aminoacid	3
Acyclic acid glycoside	2
Phenylethane glycoside	2
Monoterpene derivative	2
Iridoid glycoside	2
Carbohydrate	1
Acetophenone derivative	1
Sesquiterpenoid derivative	1
Dimeric iridoid derivative	1
Flavanone derivative	1
Bicyclo[3.1.1] glycoside	1
Dihydrochalcone derivative	1
Fatty acid glycoside	1
Flavonol	1
Lipid	1
	218
